# Supplementary material for: Somatostatin receptors (SSTR1-5) on inhibitory interneurons in the barrel cortex
Source: PubMed Central journal article supplement (PMC6957562; doi:10.1007/s00429-019-02011-7), 2019-12-23
Supplement: 429_2019_2011_MOESM1_ESM.pdf [file 429_2019_2011_MOESM1_ESM.pdf]

## Supplementary figures

Figures present colocalization of particular SSTRs (SSTR1-SSTR5) with three analysed types of interneurons (PV, SST and VIP) in different layers of mouse somatosensory cortex.

Each panel consists of confocal microscopy images of representative coronal sections. First column shows SSTRs in green + DAPI in blue; Second column shows INs in red + DAPI in blue; Third column presents colocalizations. Scale bars: 10  $\mu\text{m}$ .

SSTR1/PV/DAPI

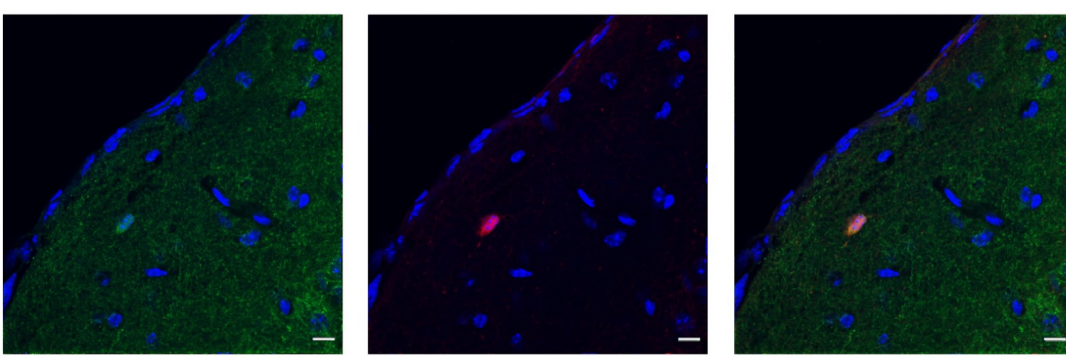

L1

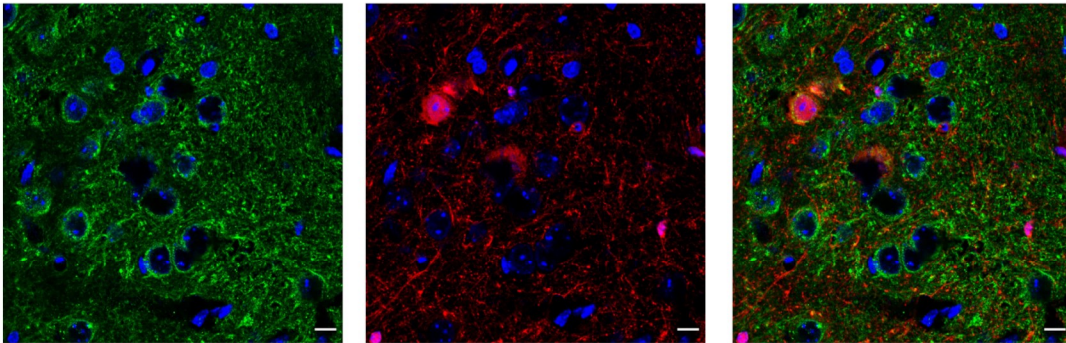

L2

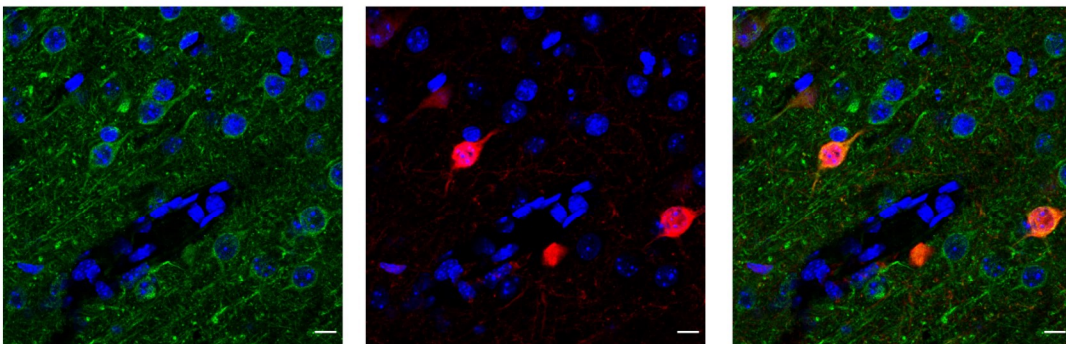

L3

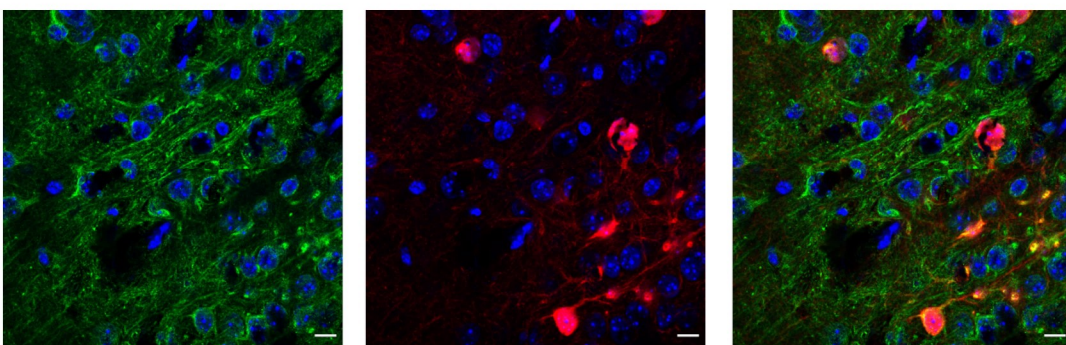

L4

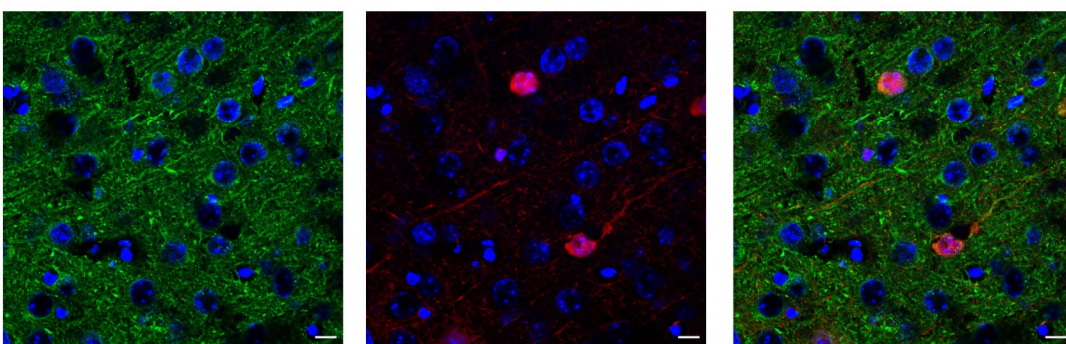

L5

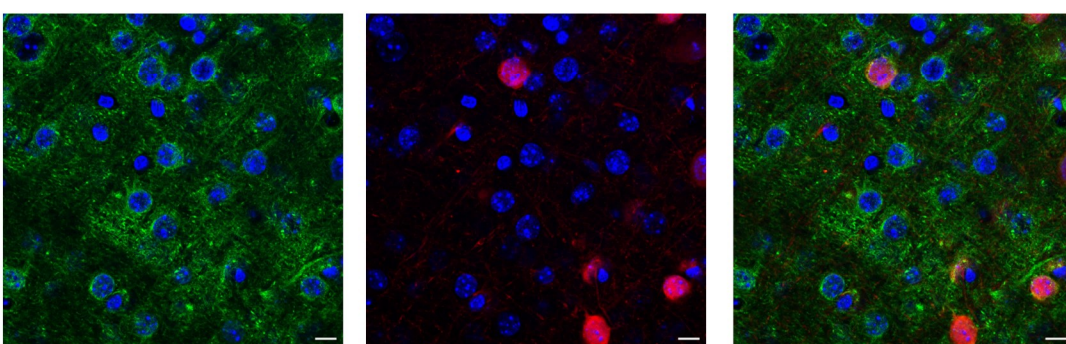

L6



SSTR2/PV/DAPI

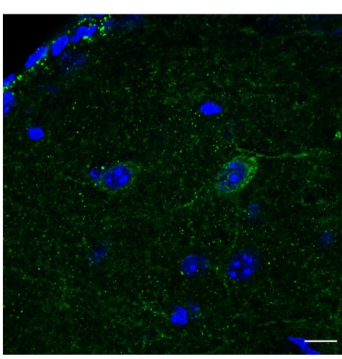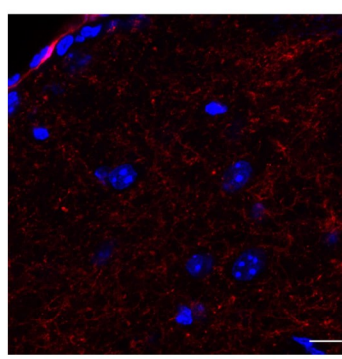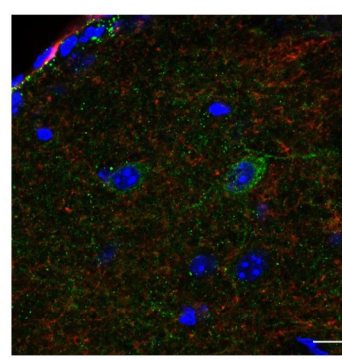

L1

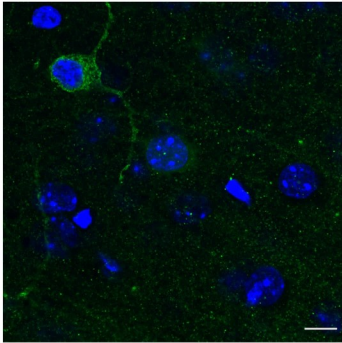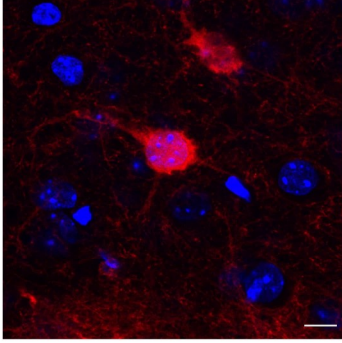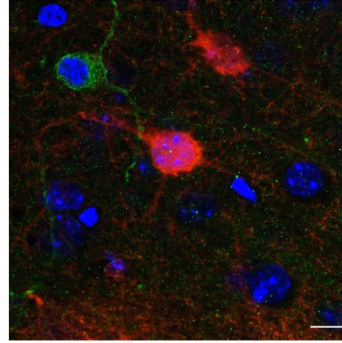

L2

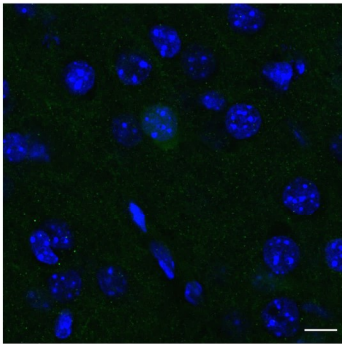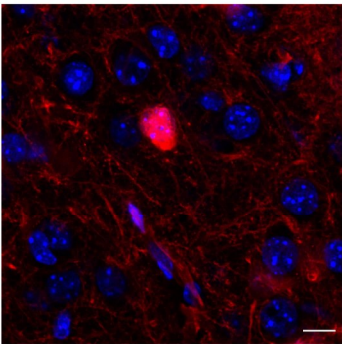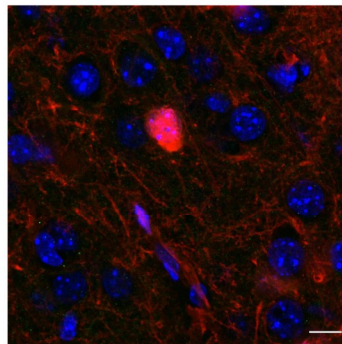

L3

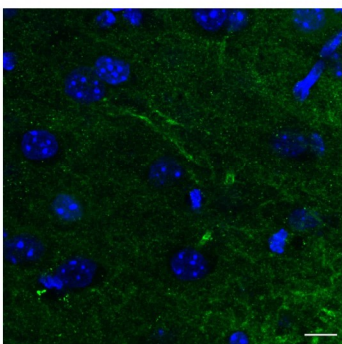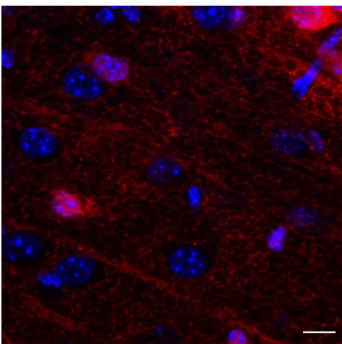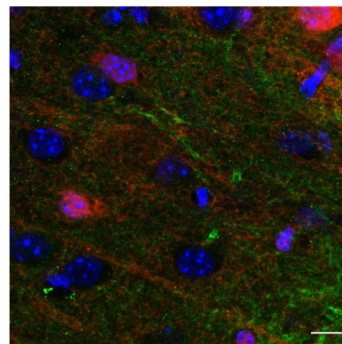

L4

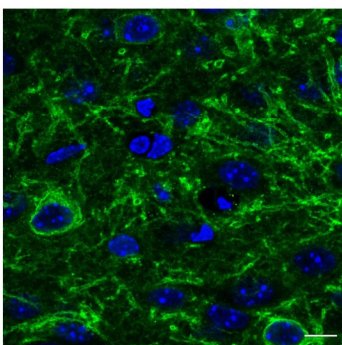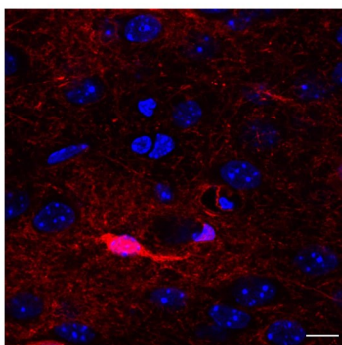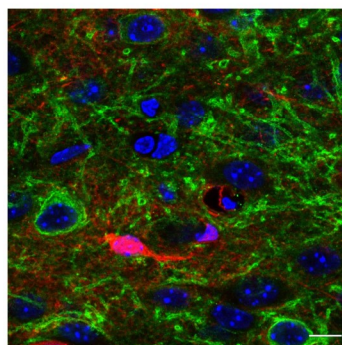

L5

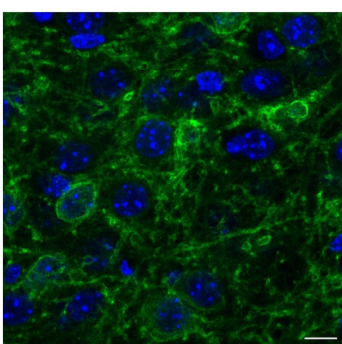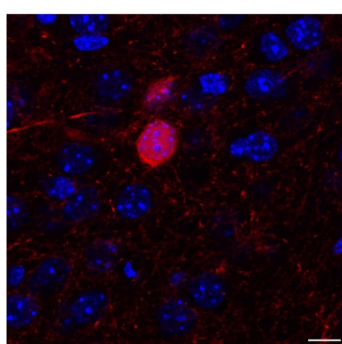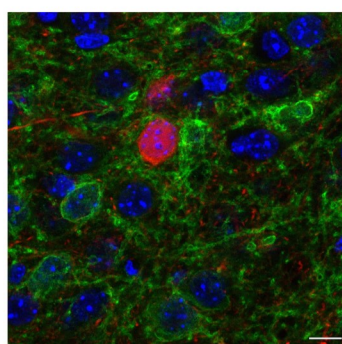

L6



SSTR3/PV/DAPI

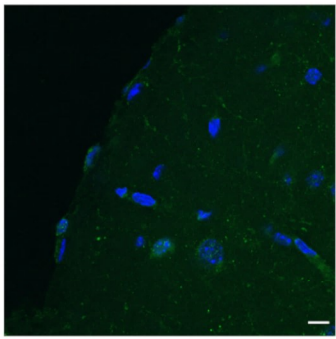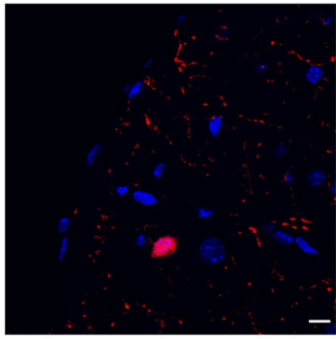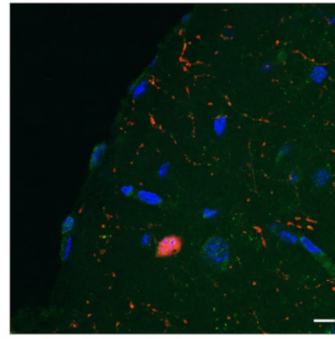

L1

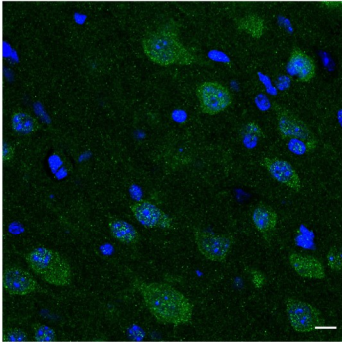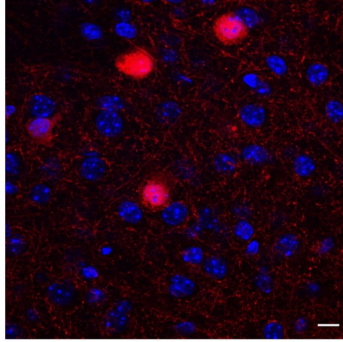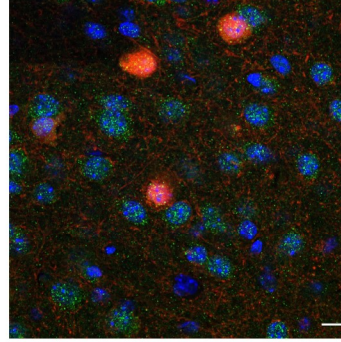

L2

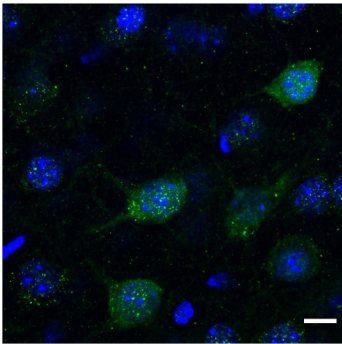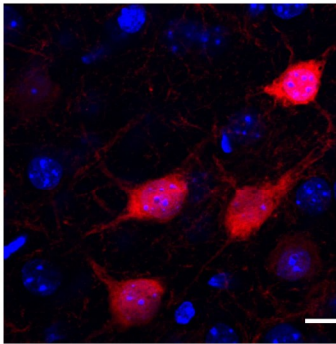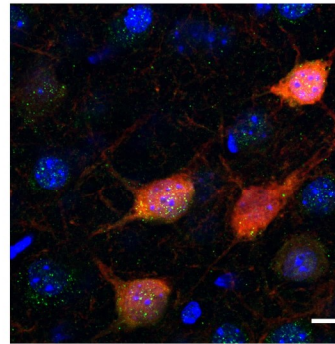

L3

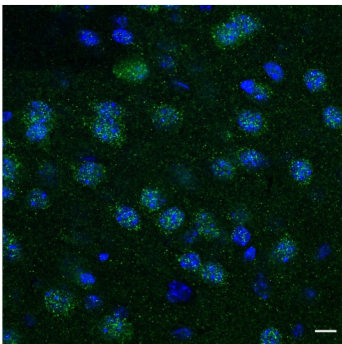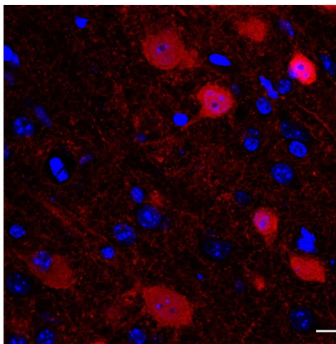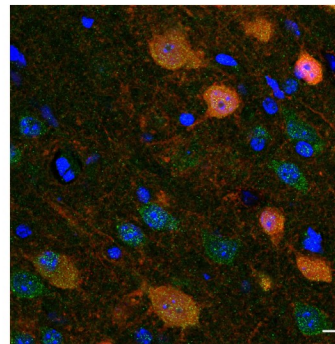

L4

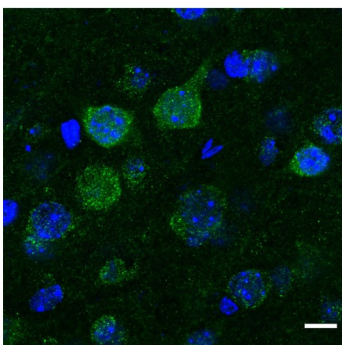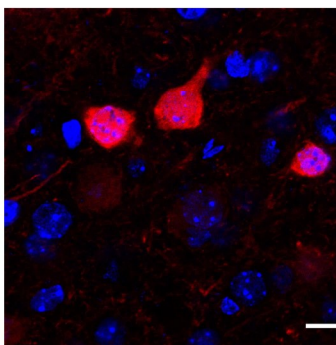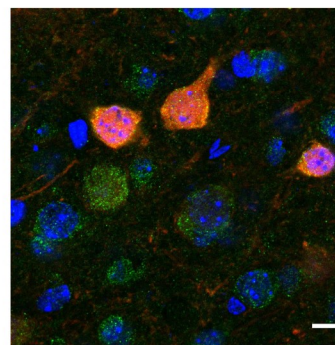

L5

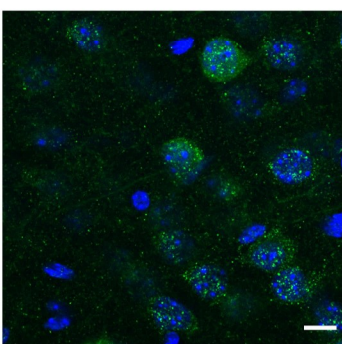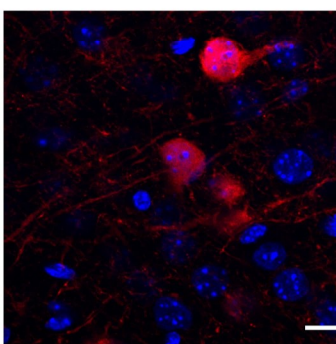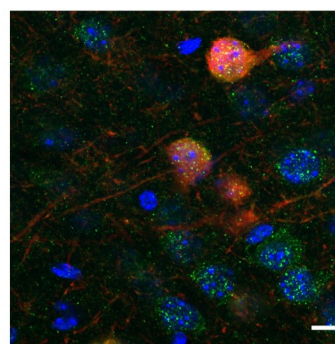

L6



SSTR4/PV/DAPI

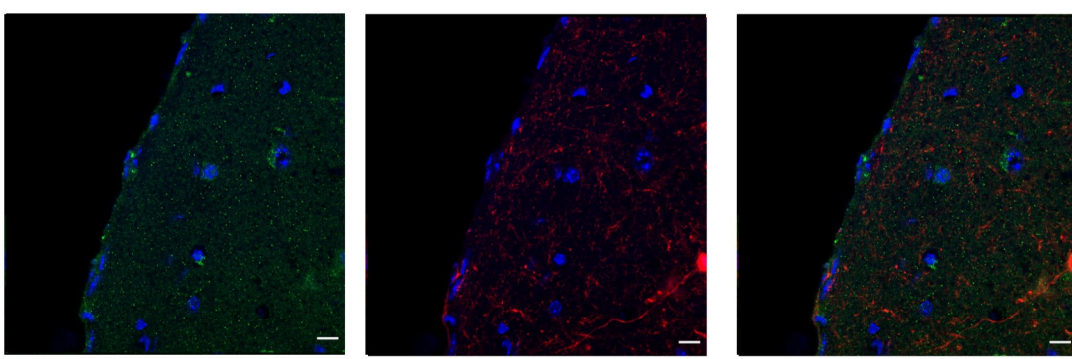

L1

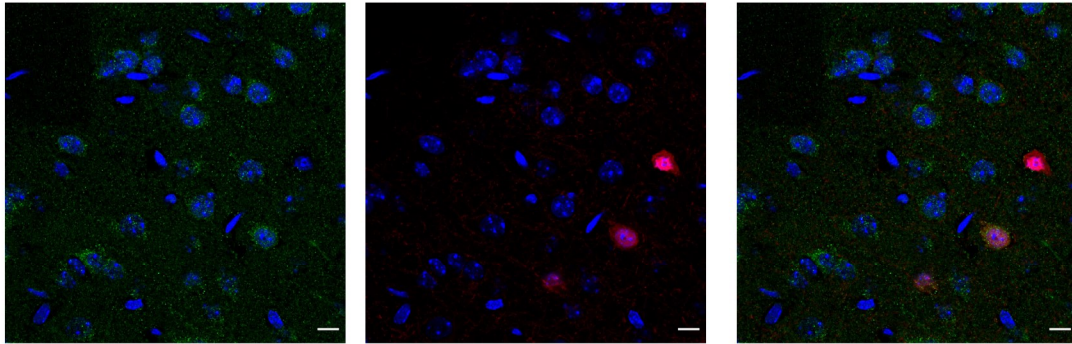

L2

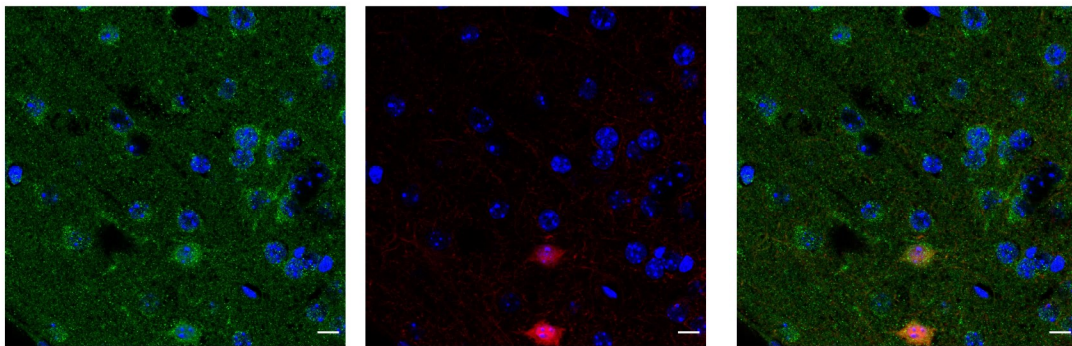

L3

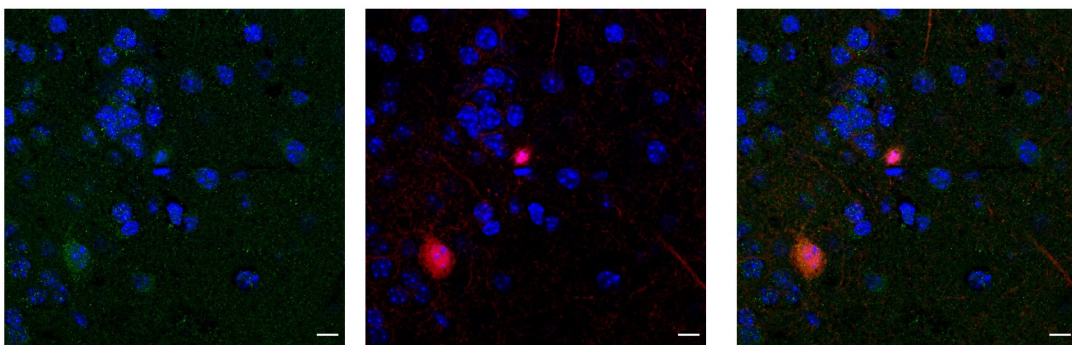

L4

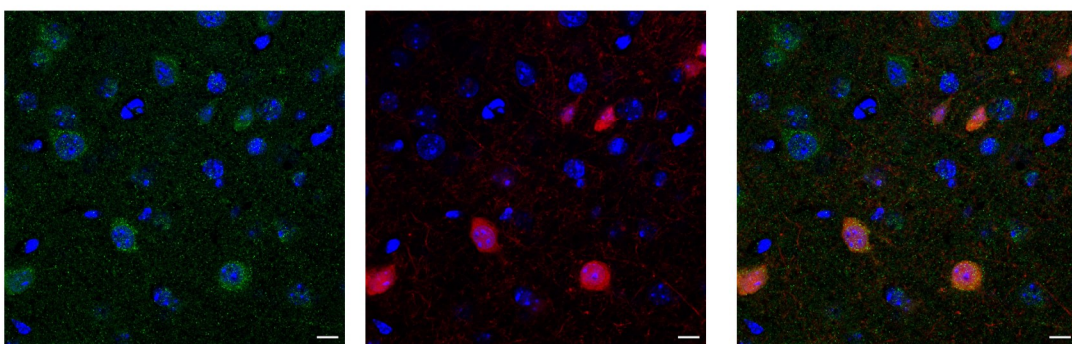

L5

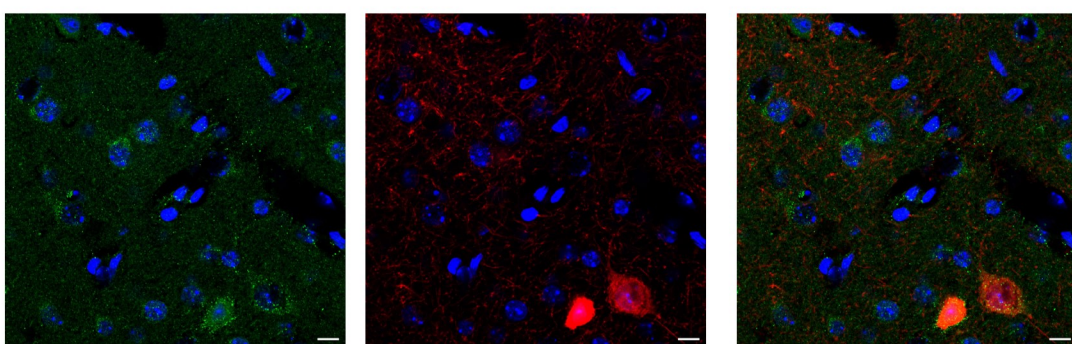

L6



SSTR5/PV/DAPI

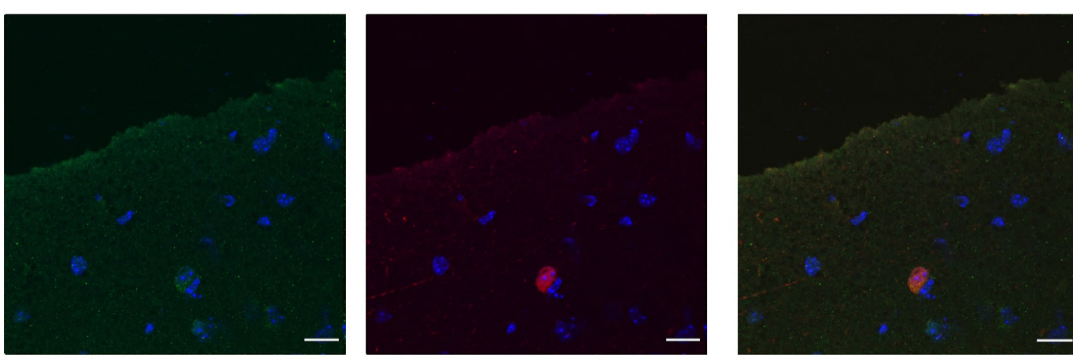

L1

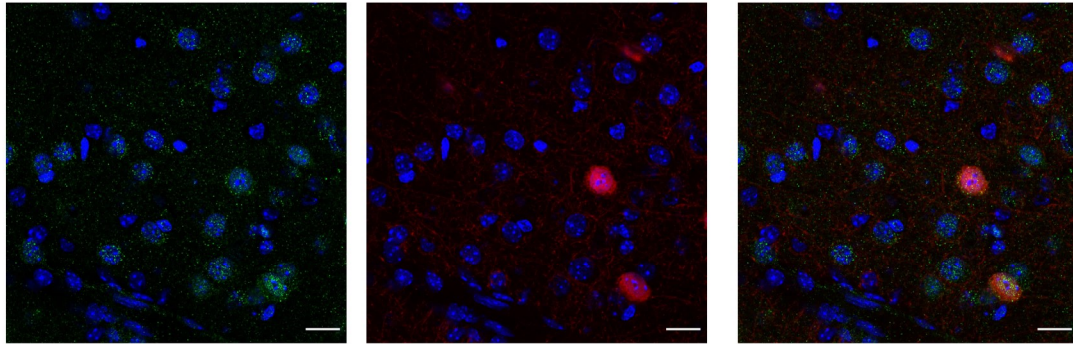

L2

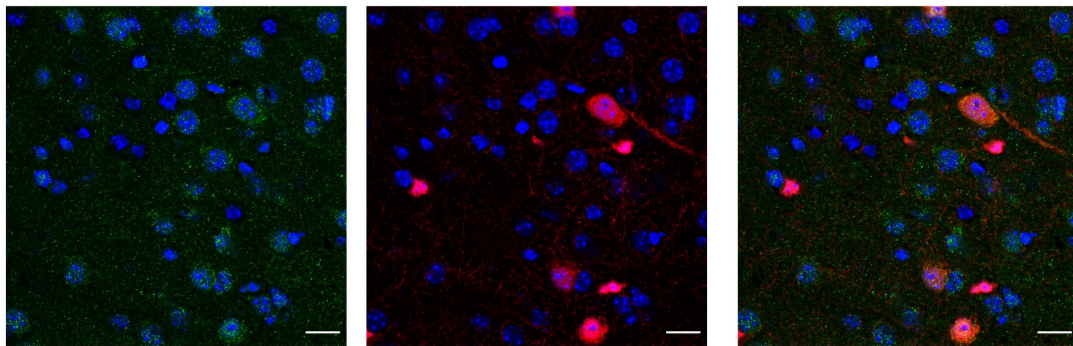

L3

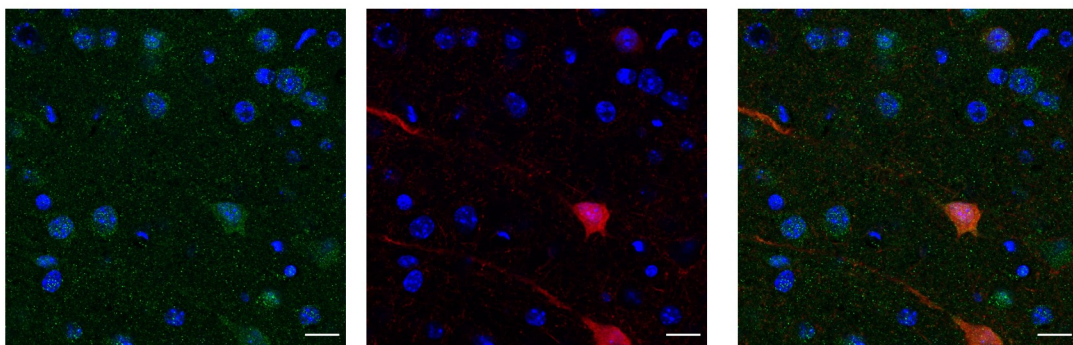

L4

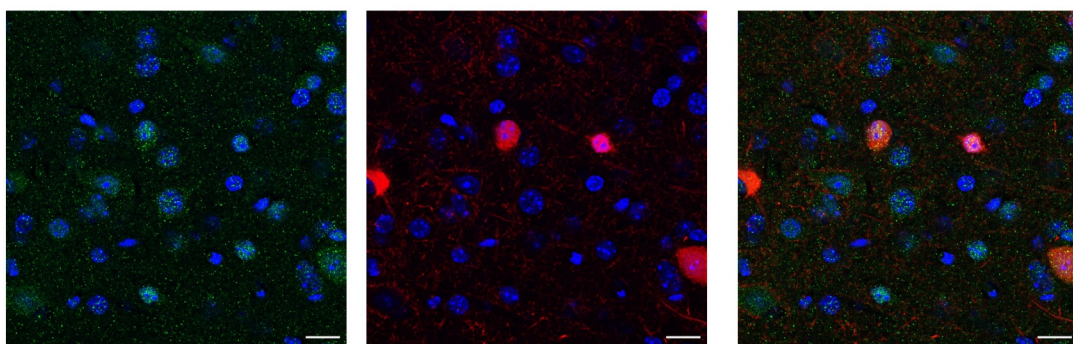

L5

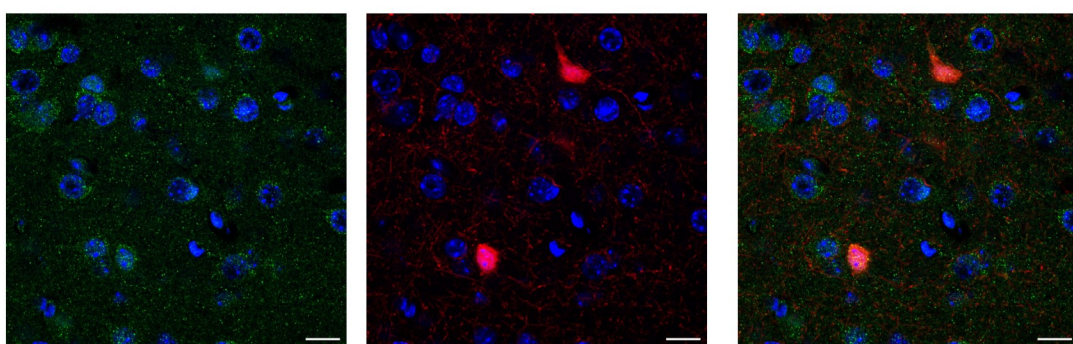

L6



SSTR1/SST/DAPI

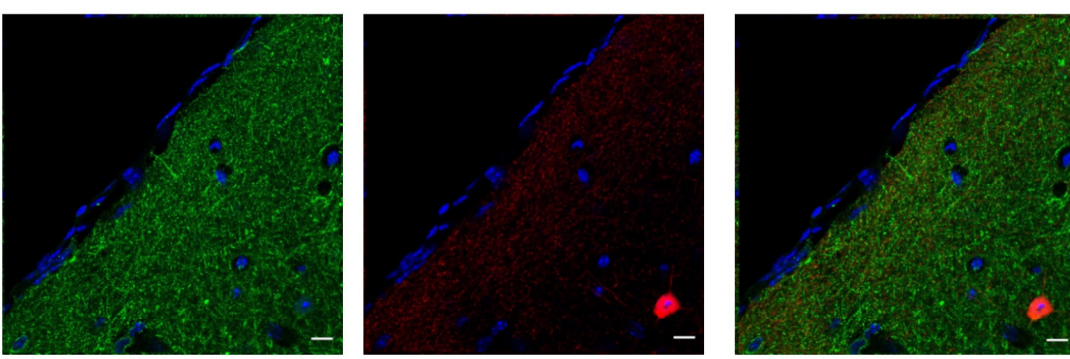

L1

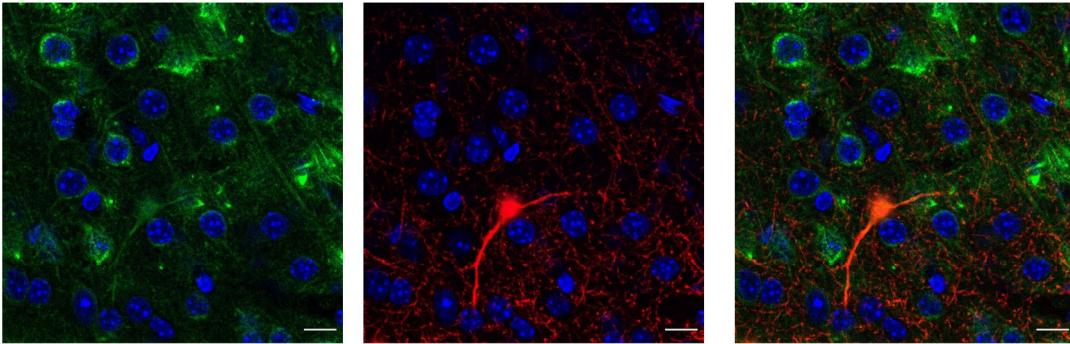

L2

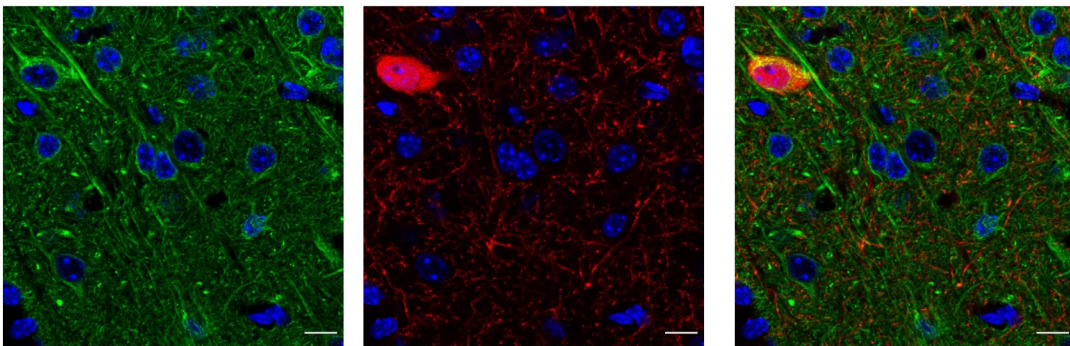

L3

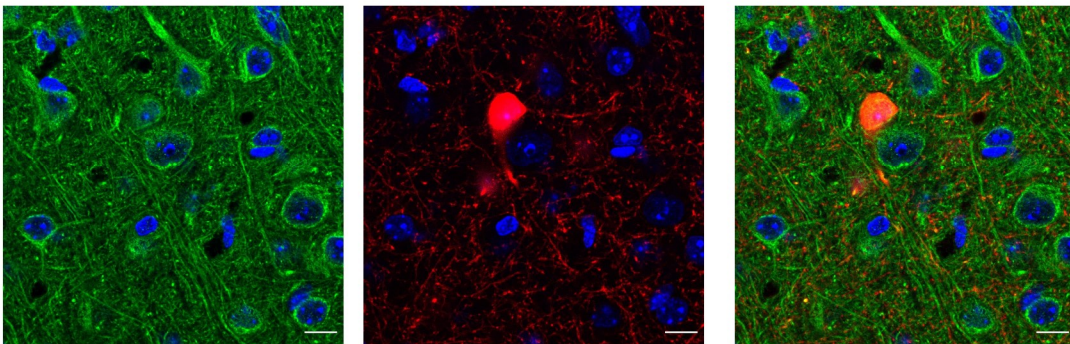

L4

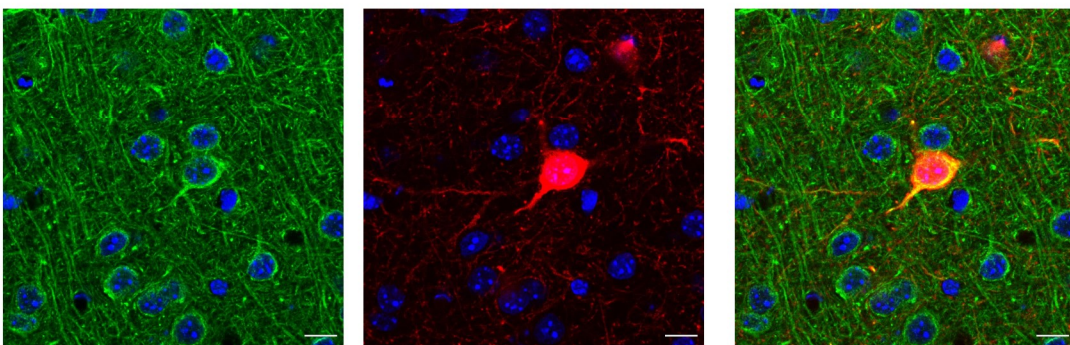

L5

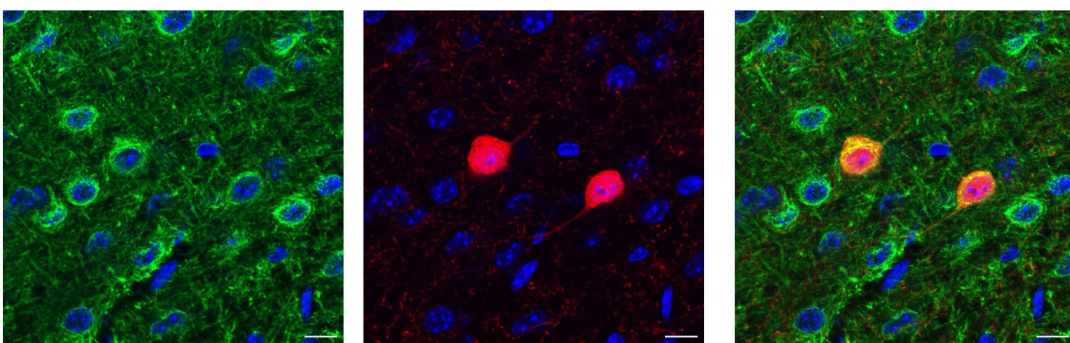

L6



SSTR2/SST/DAPI

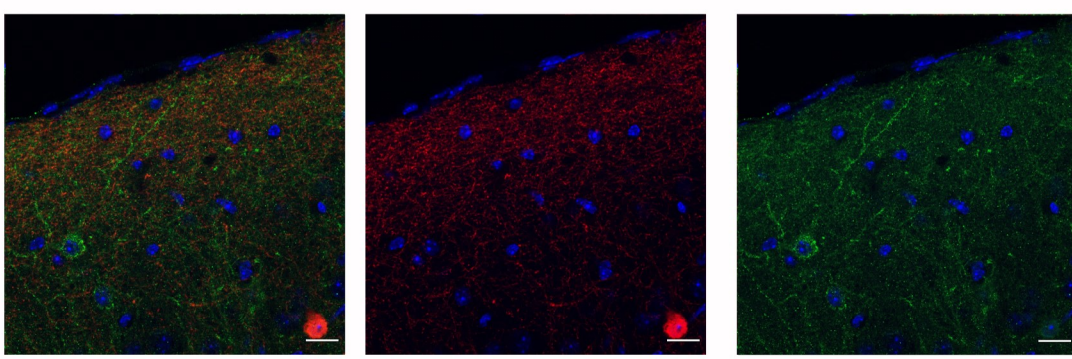

L1

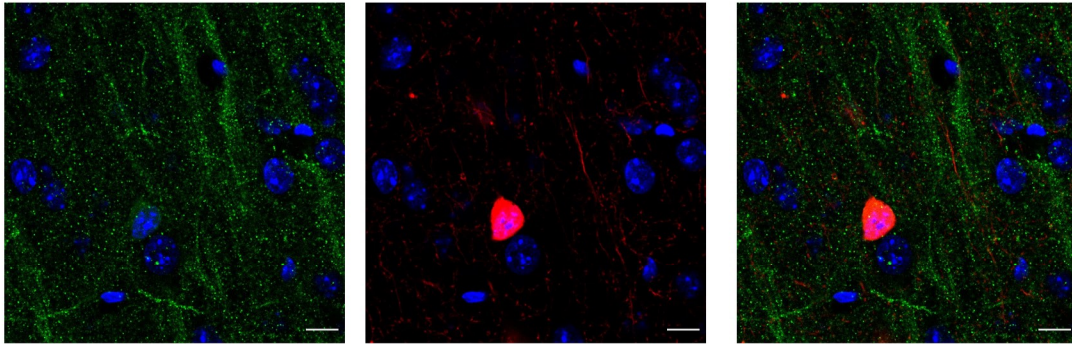

L2

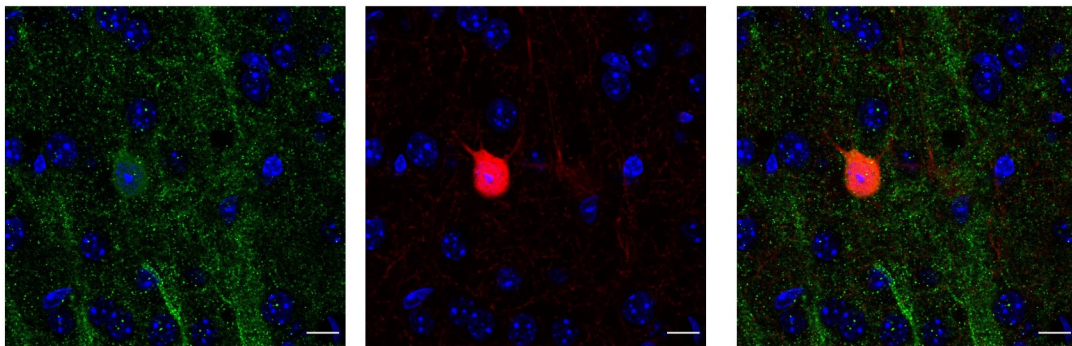

L3

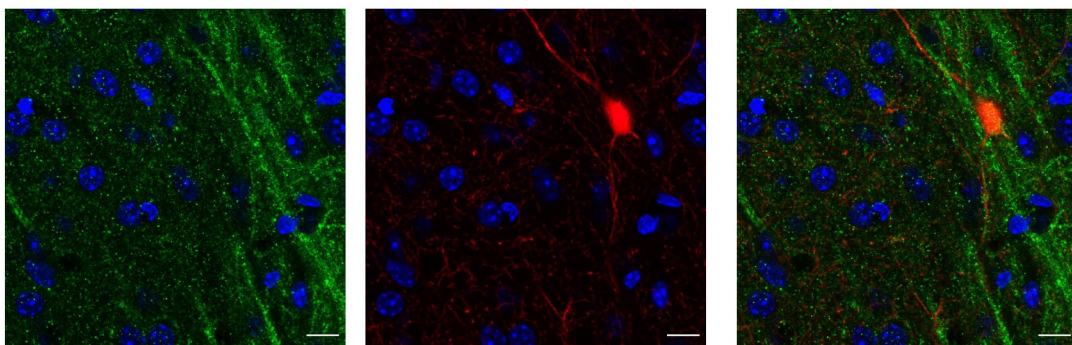

L4

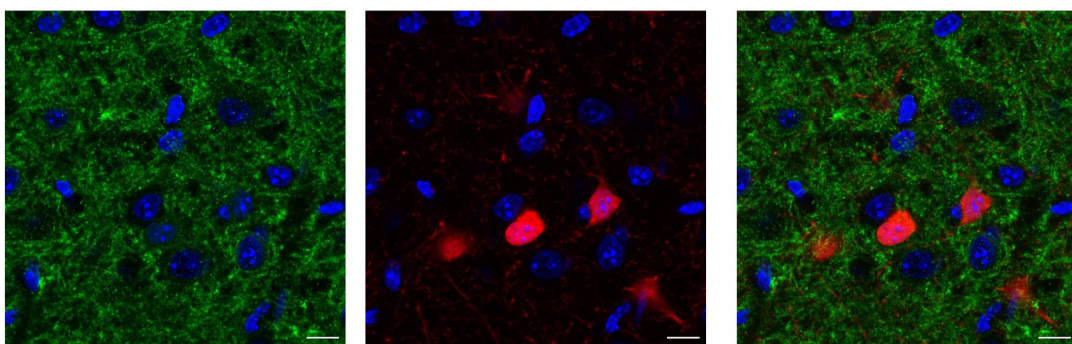

L5

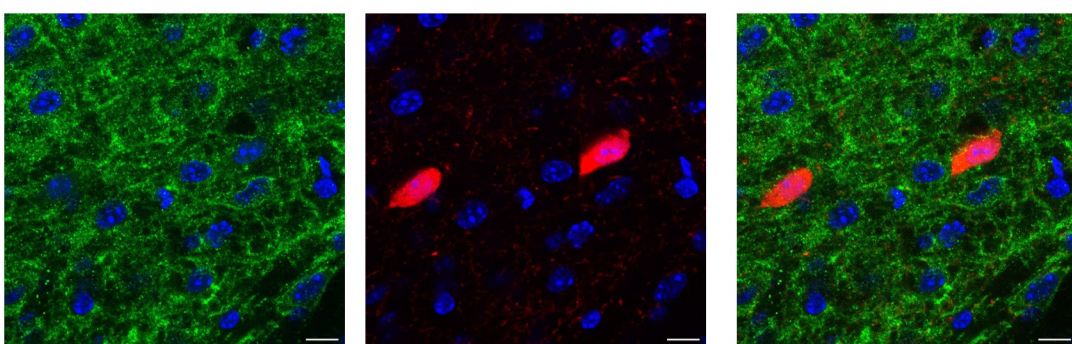

L6



SSTR3/SST/DAPI

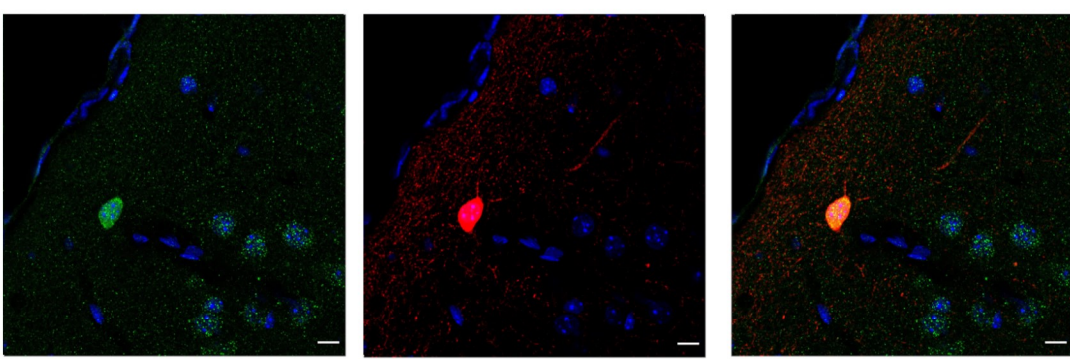

L1

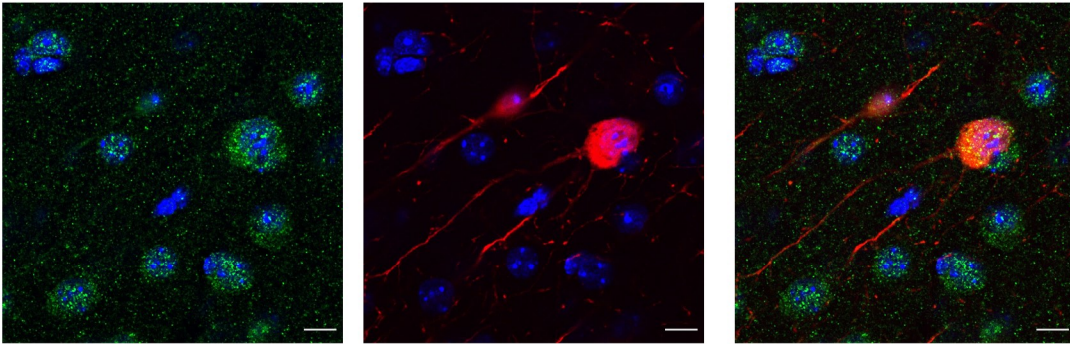

L2

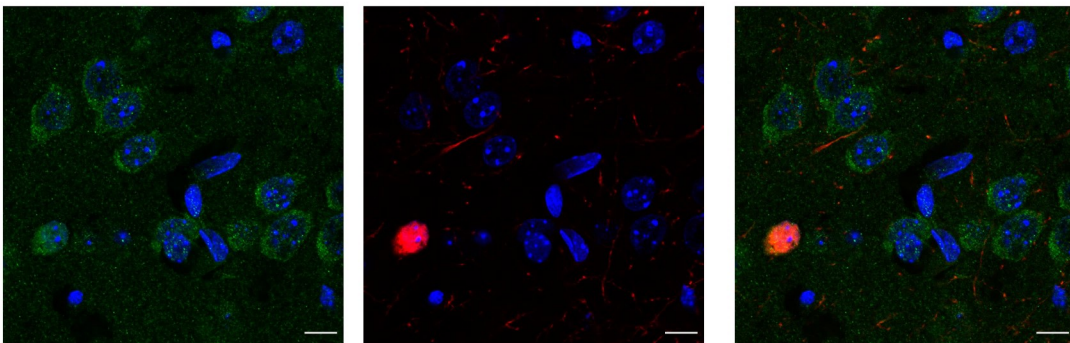

L3

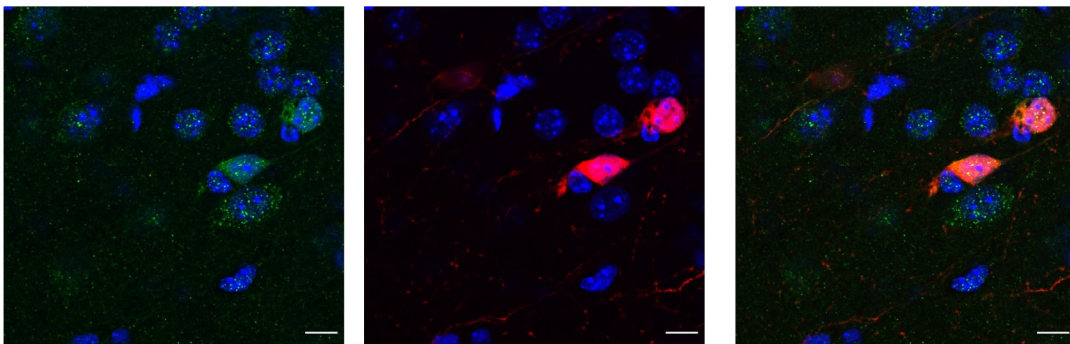

L4

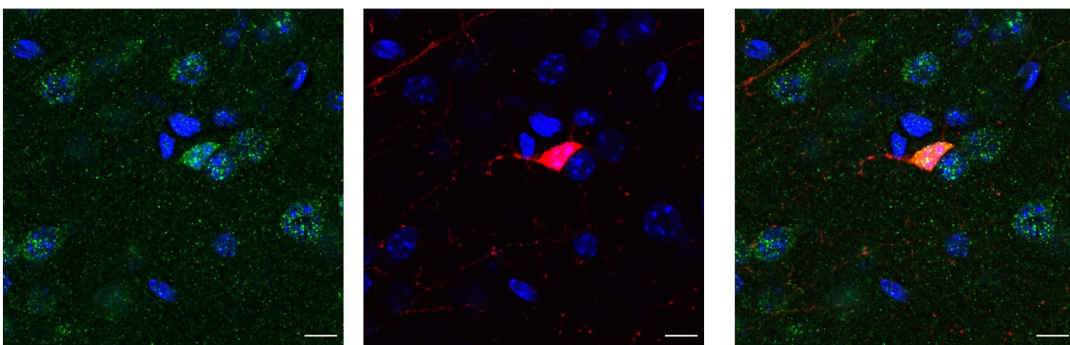

L5

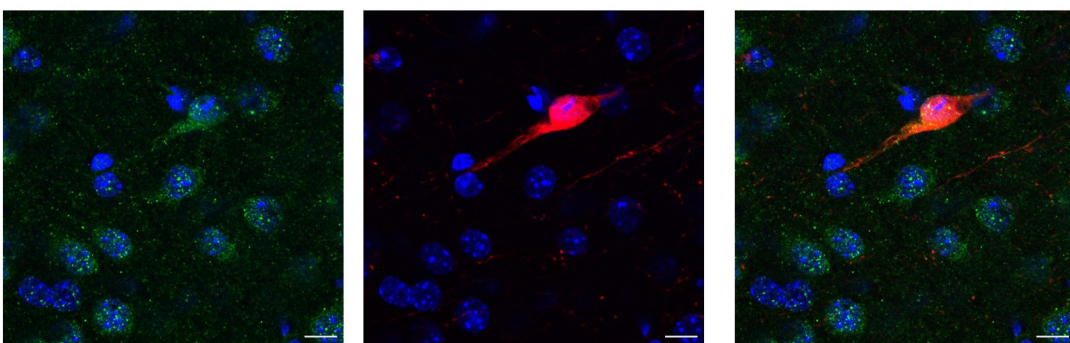

L6



SSTR4/SST/DAPI

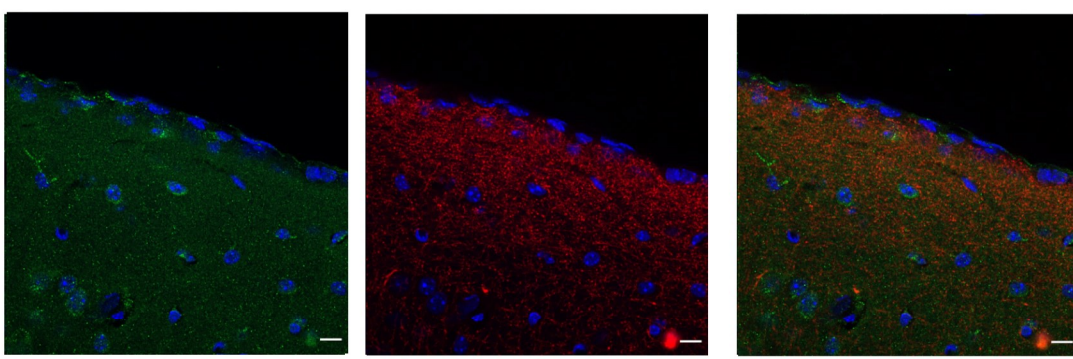

L1

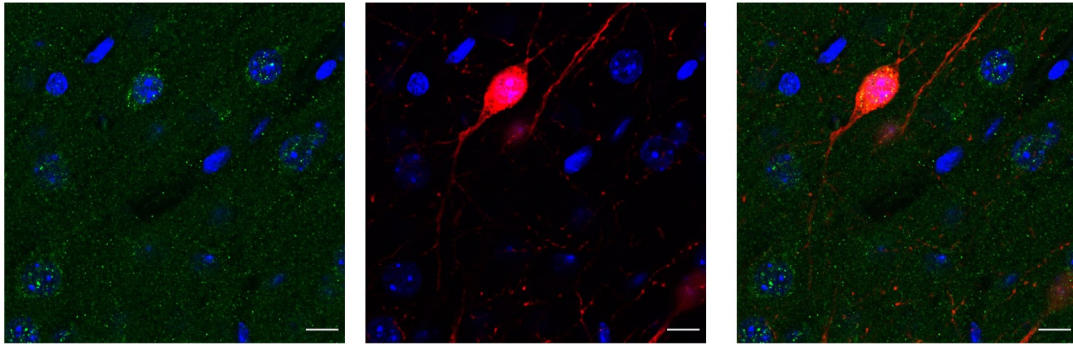

L2

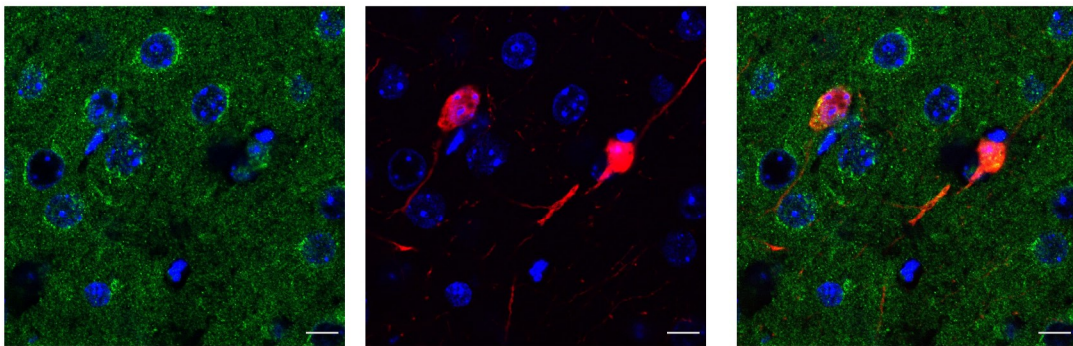

L3

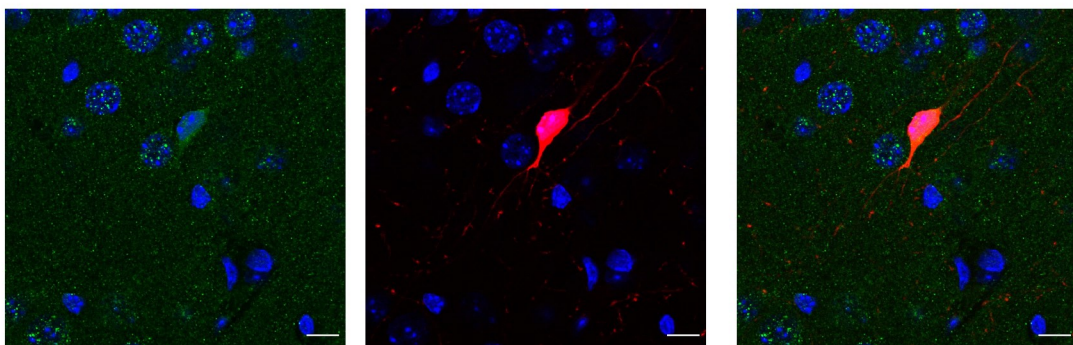

L4

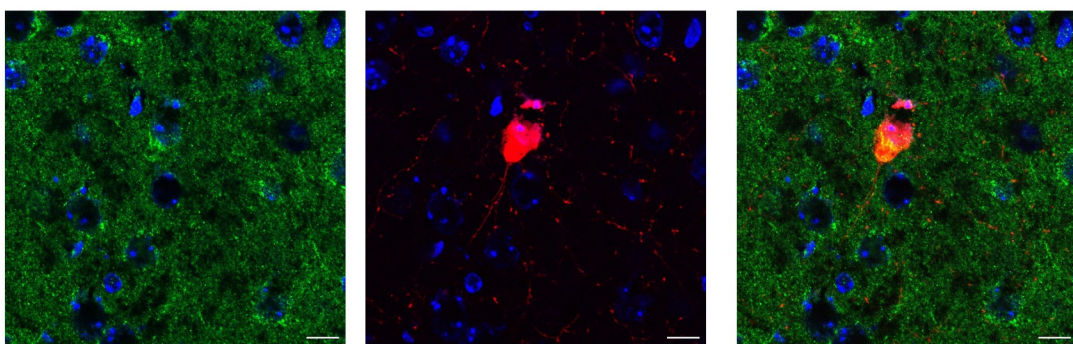

L5

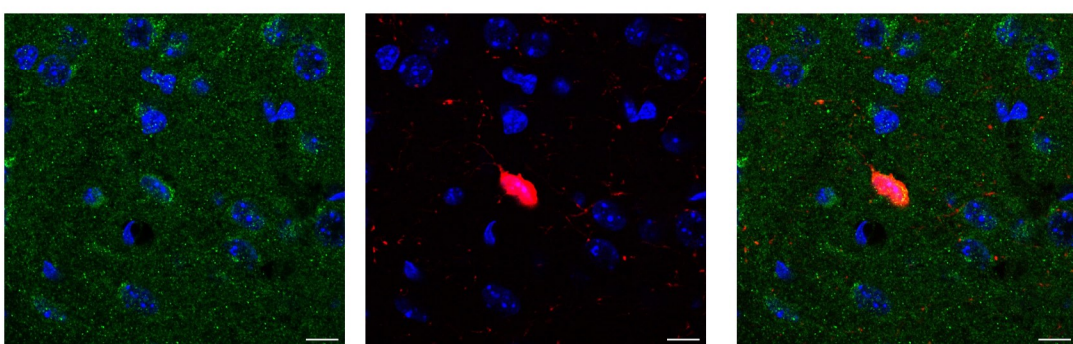

L6



SSTR5/SST/DAPI

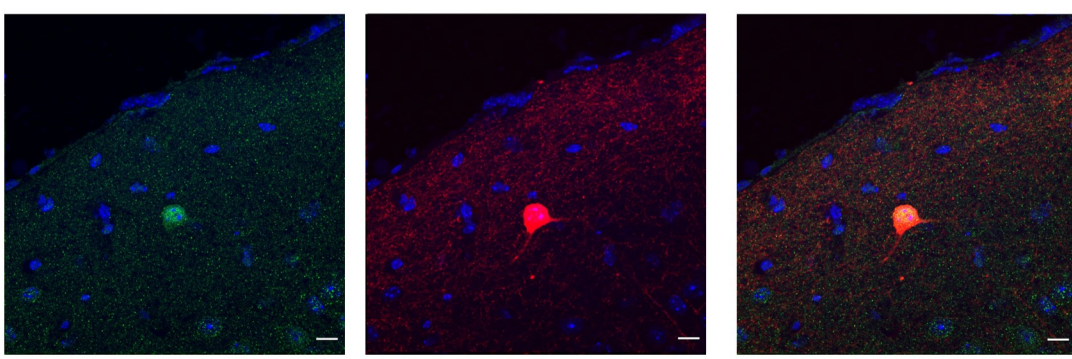

L1

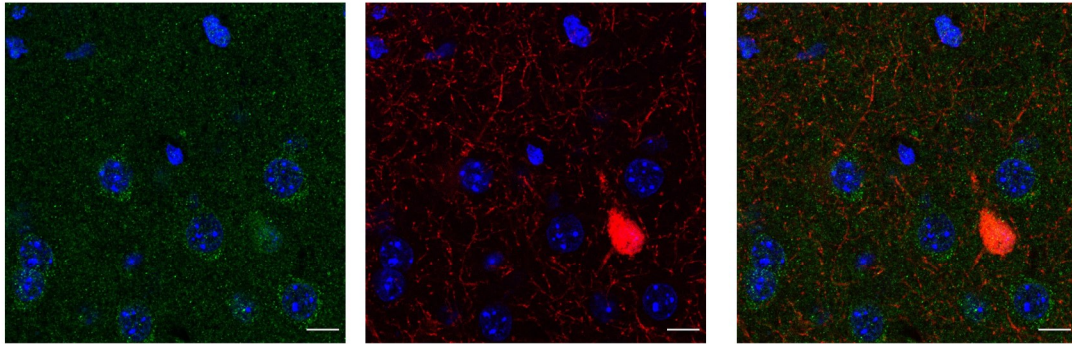

L2

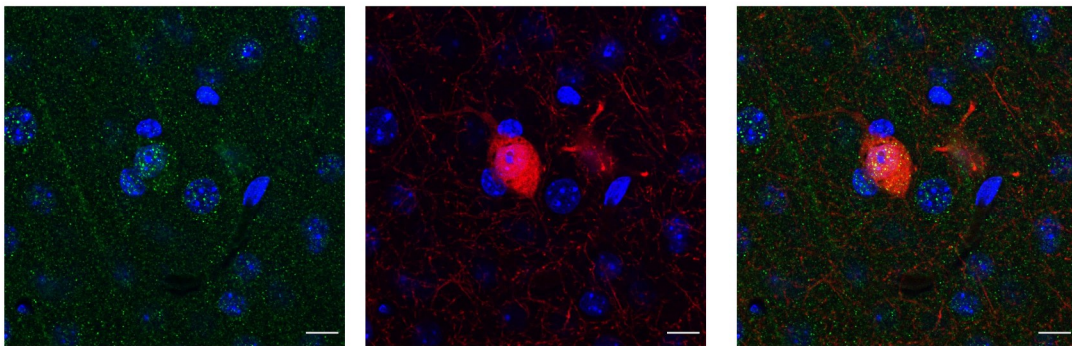

L3

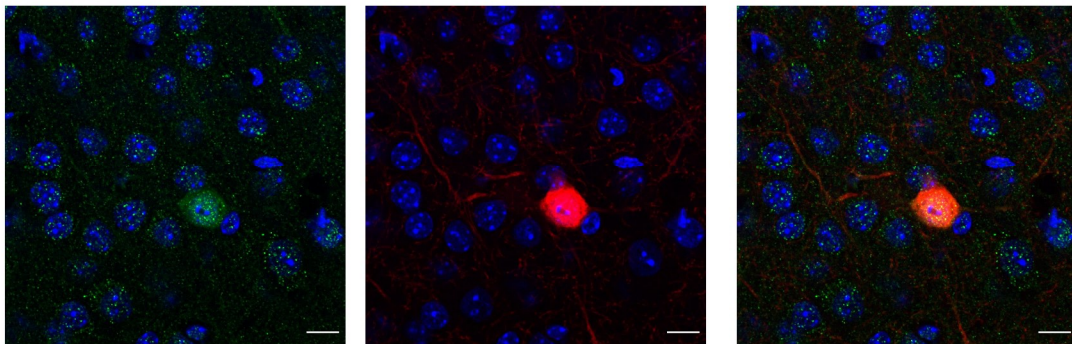

L4

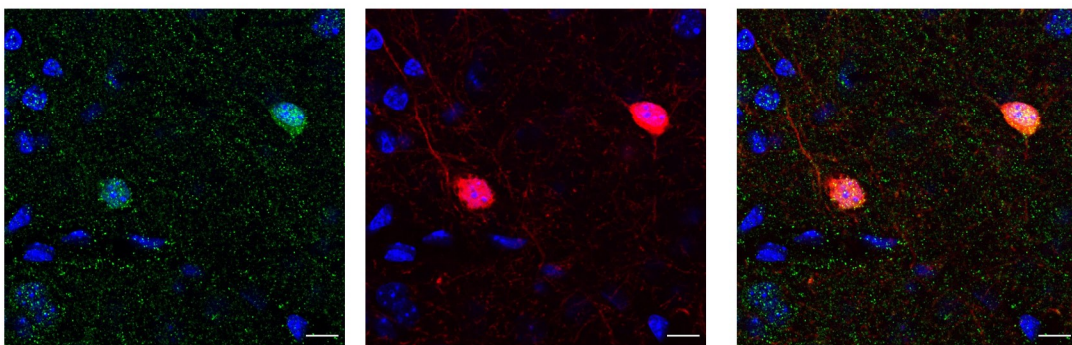

L5

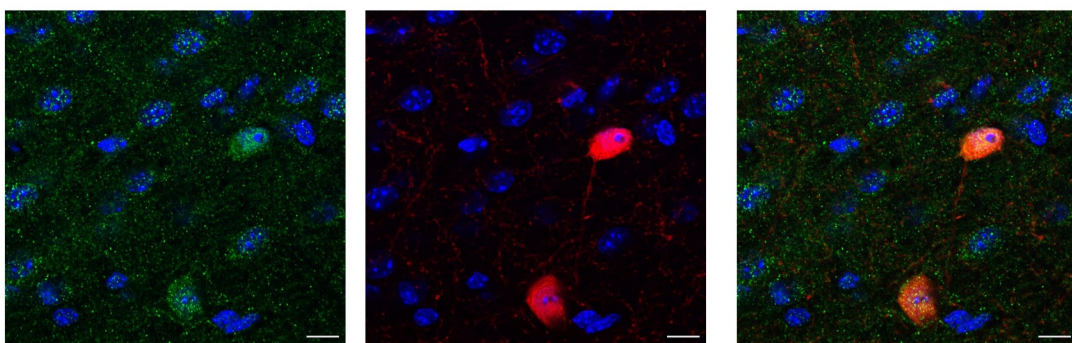

L6



SSTR1/VIP/DAPI

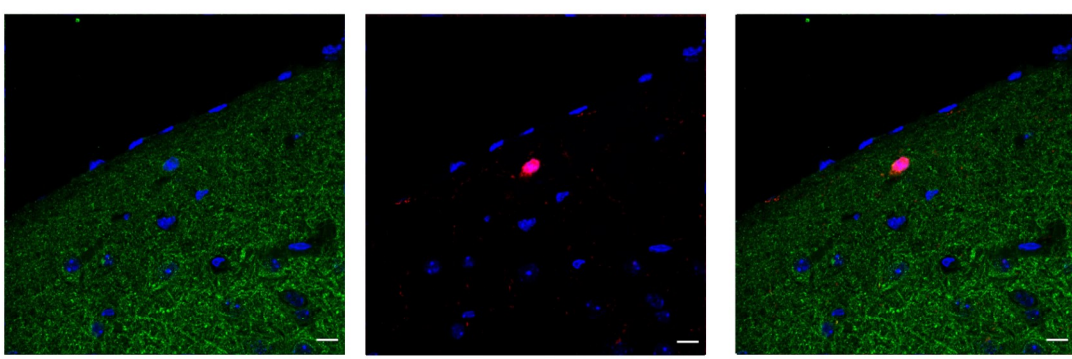

L1

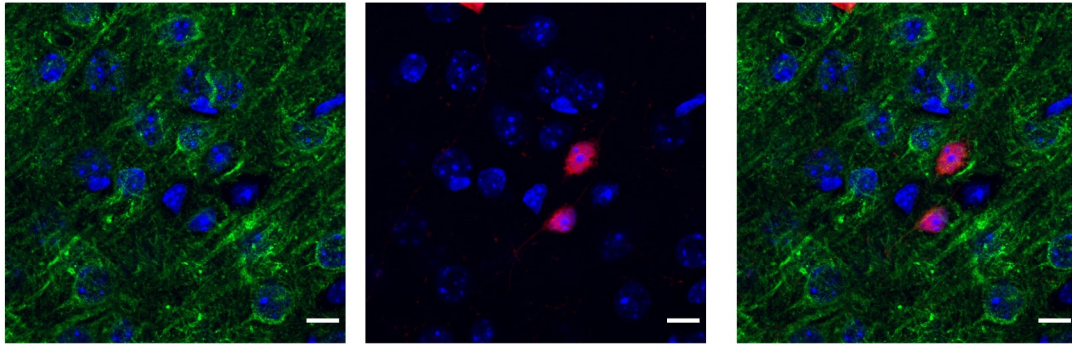

L2

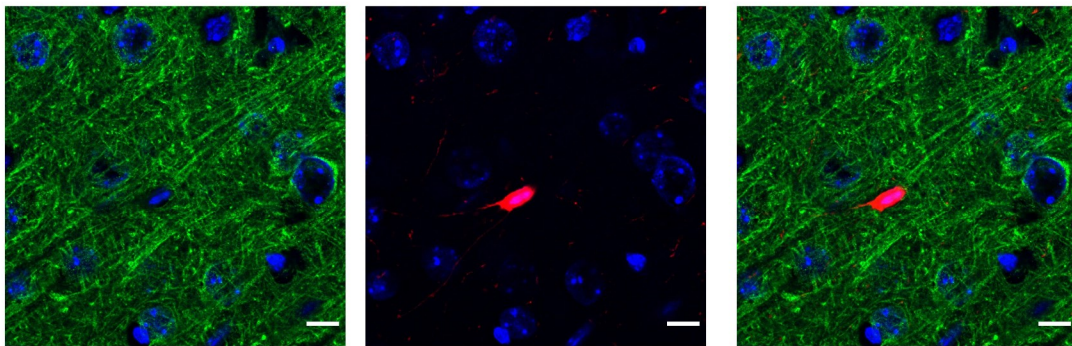

L3

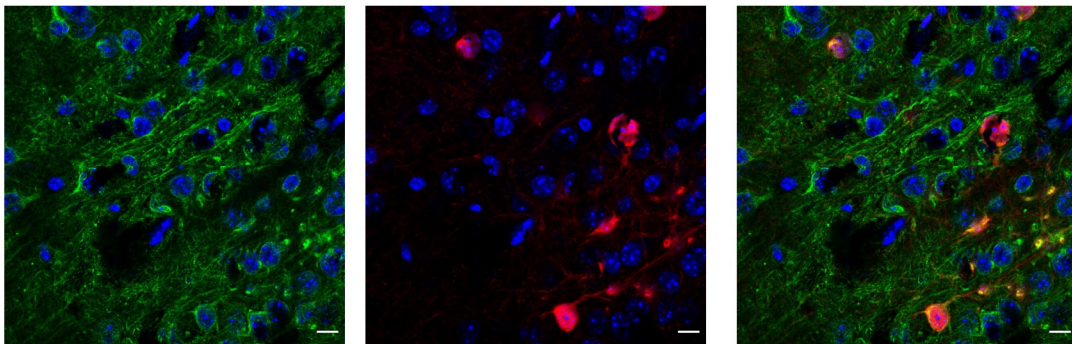

L4

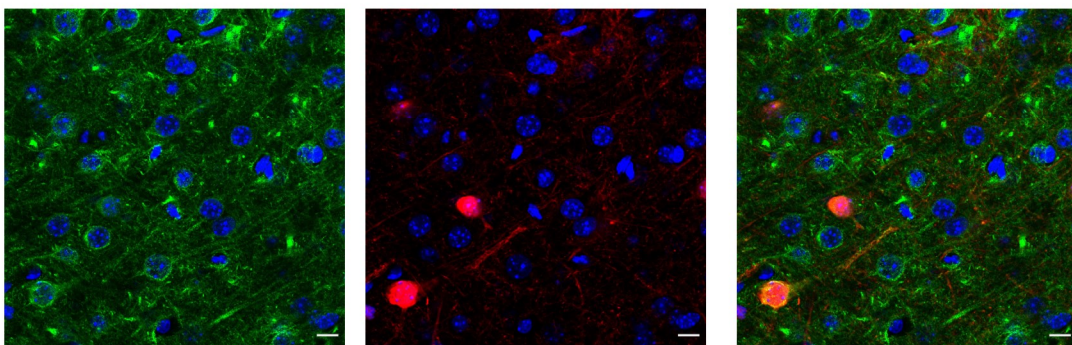

L5

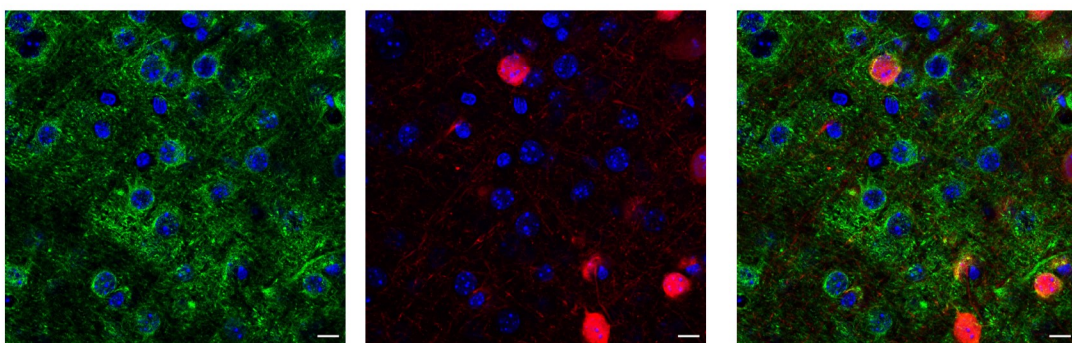

L6



SSTR2/VIP/DAPI

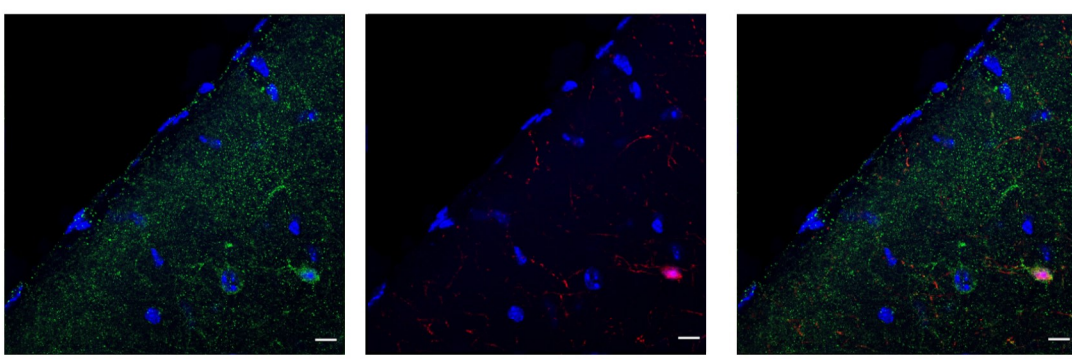

L1

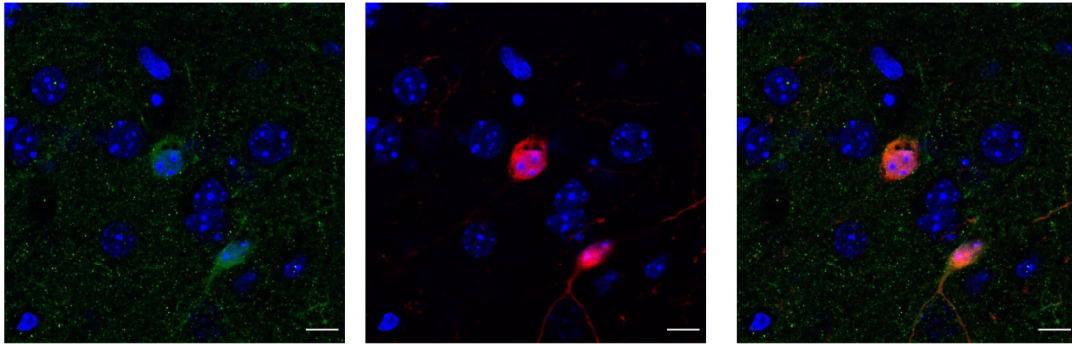

L2

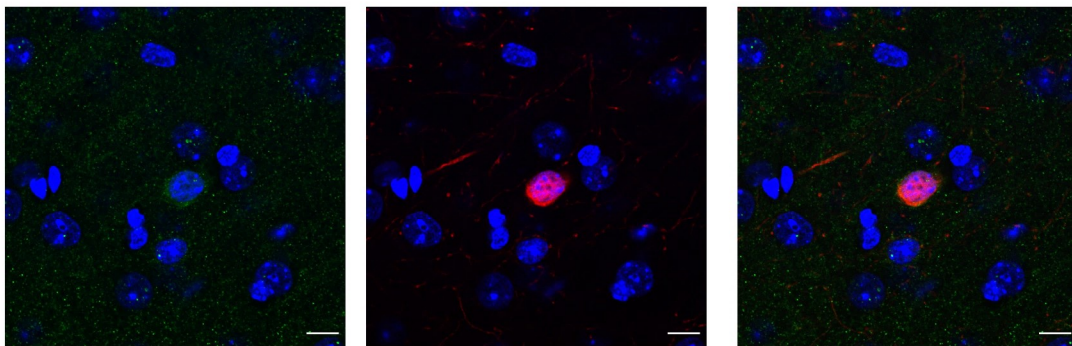

L3

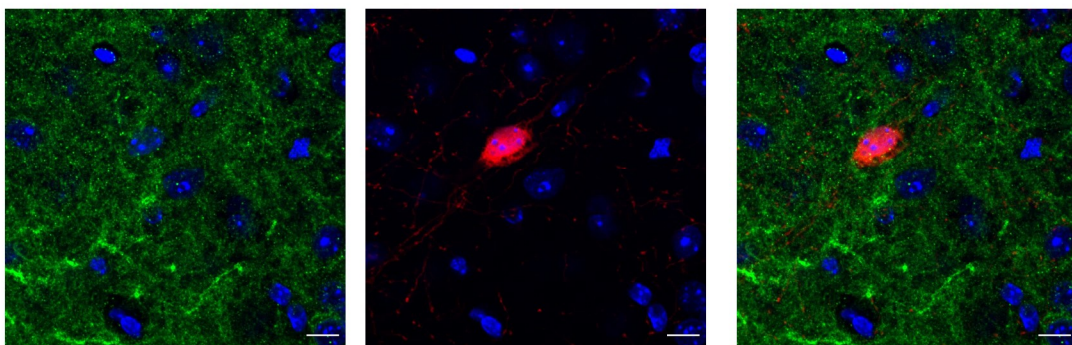

L4

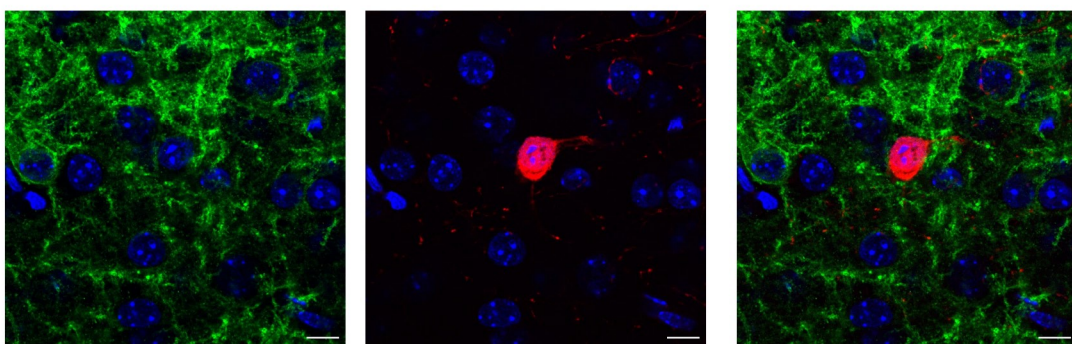

L5

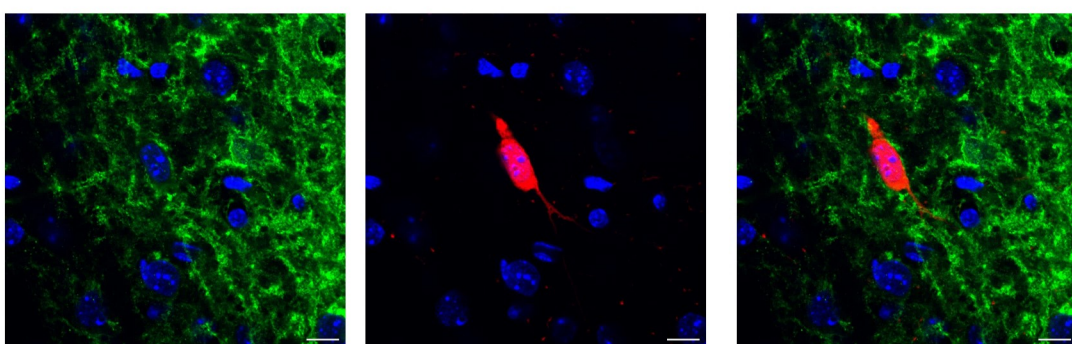

L6



SSTR3/VIP/DAPI

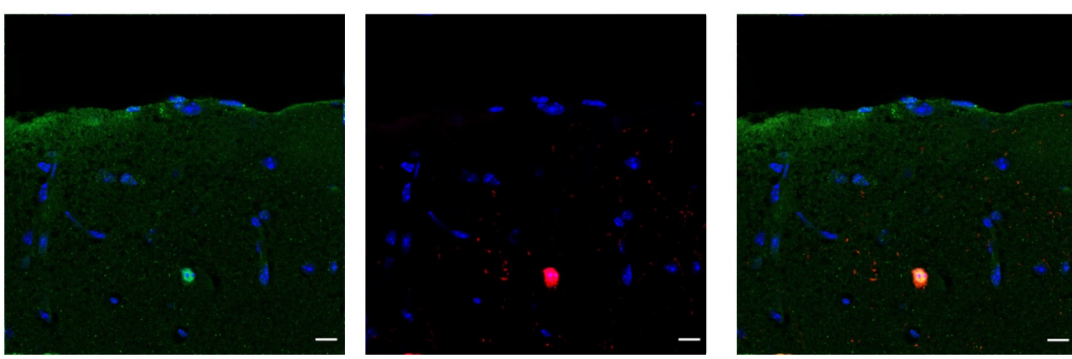

L1

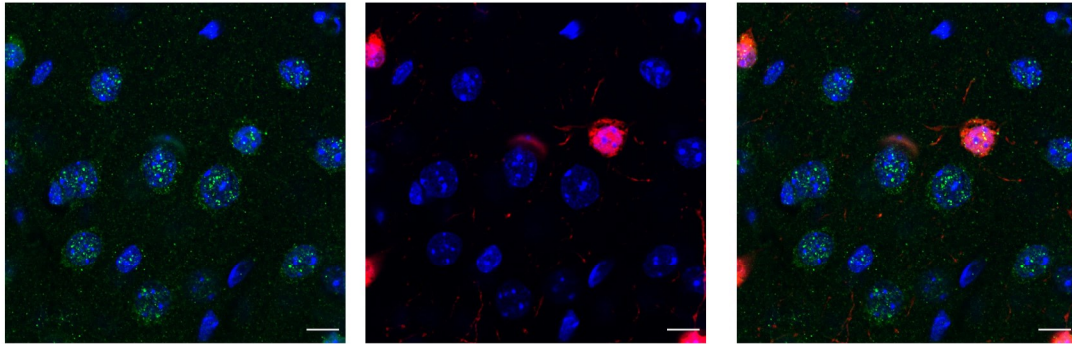

L2

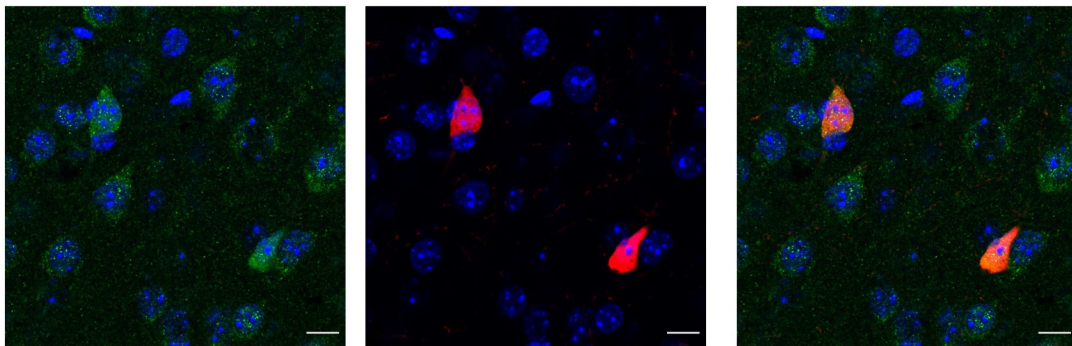

L3

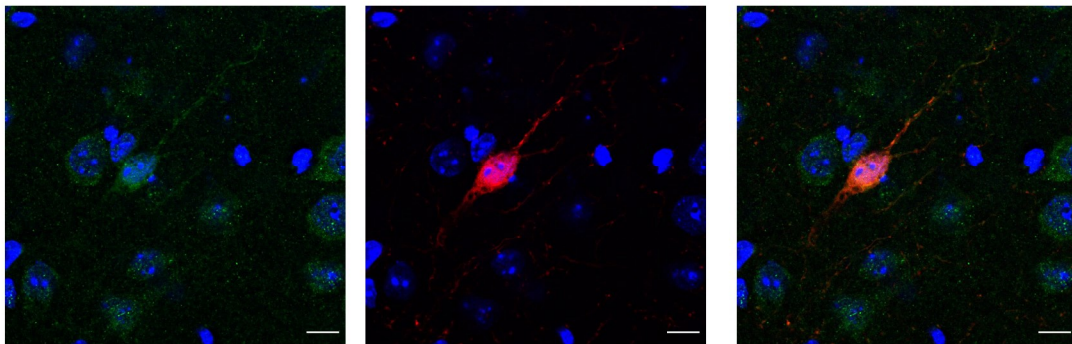

L4

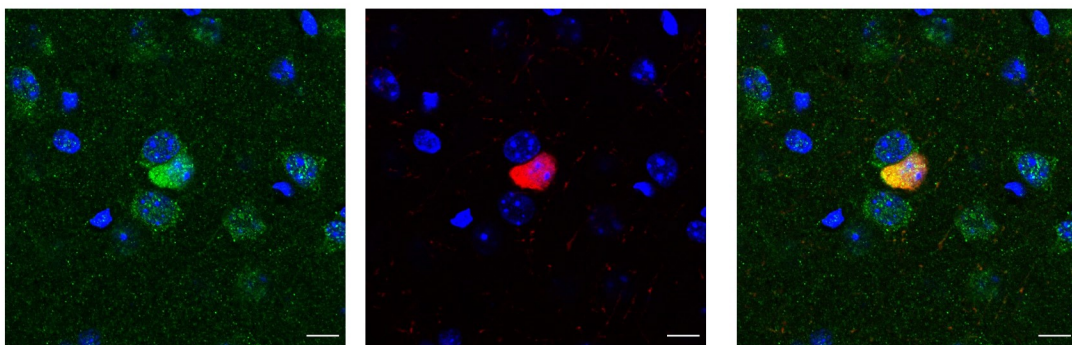

L5

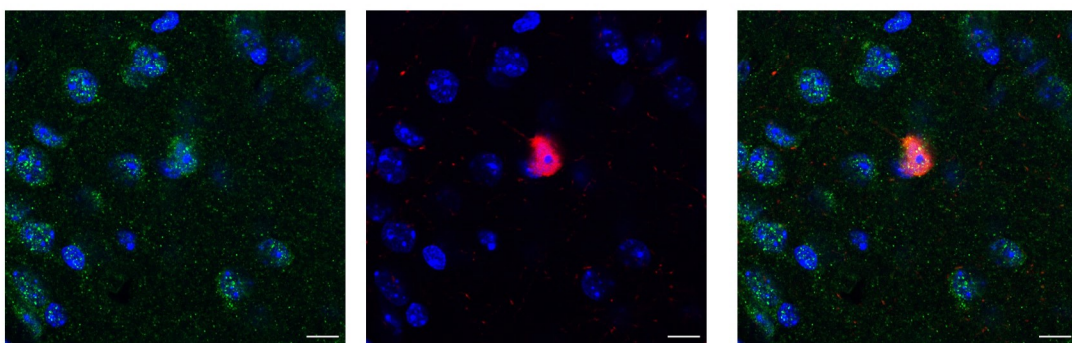

L6



SSTR4/VIP/DAPI

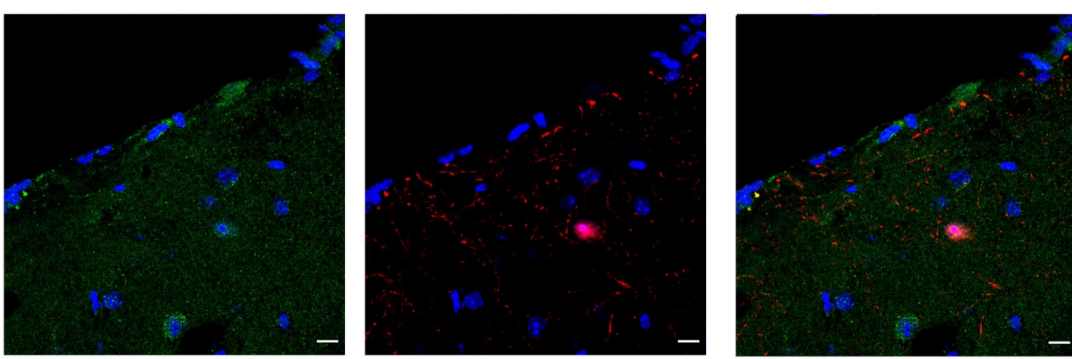

L1

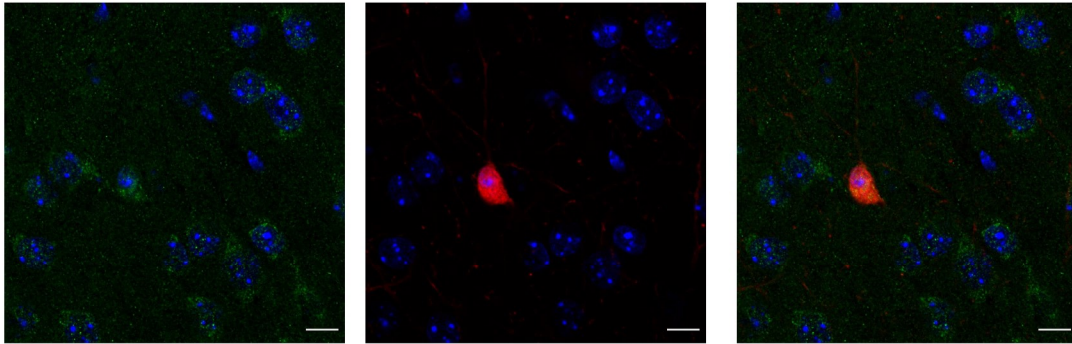

L2

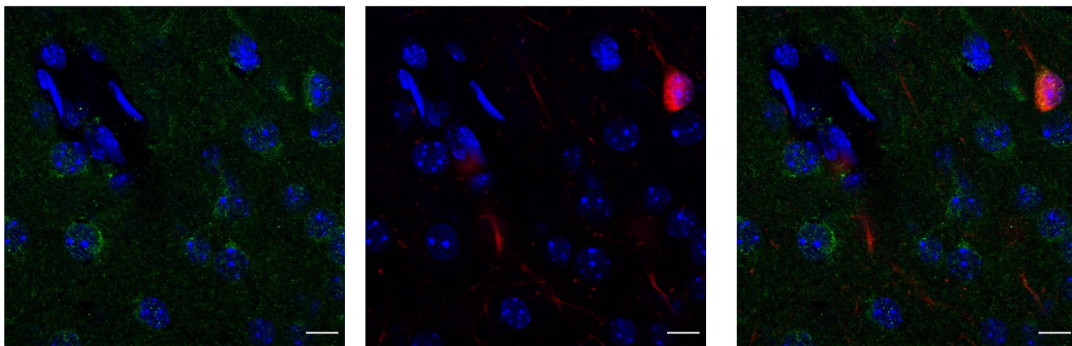

L3

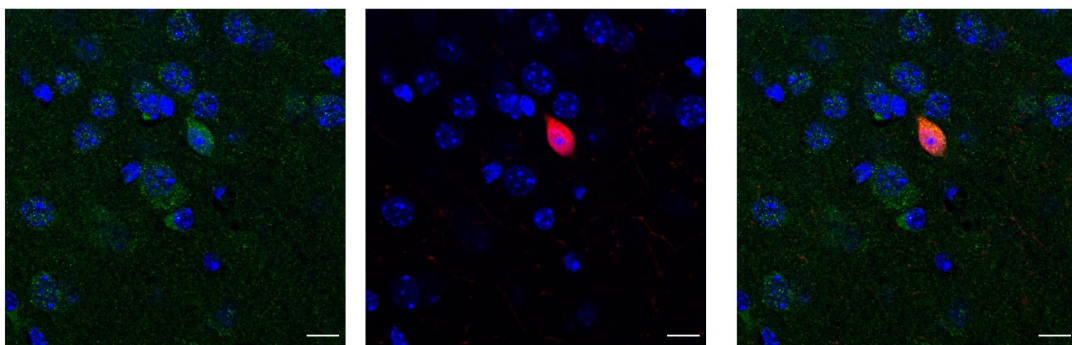

L4

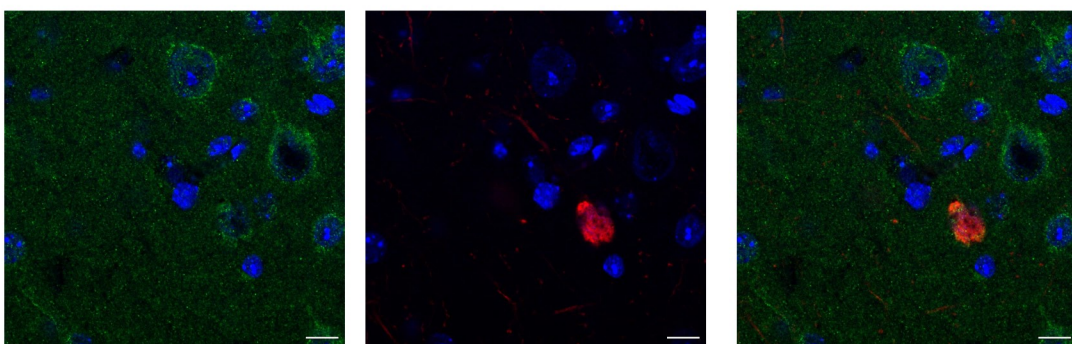

L5

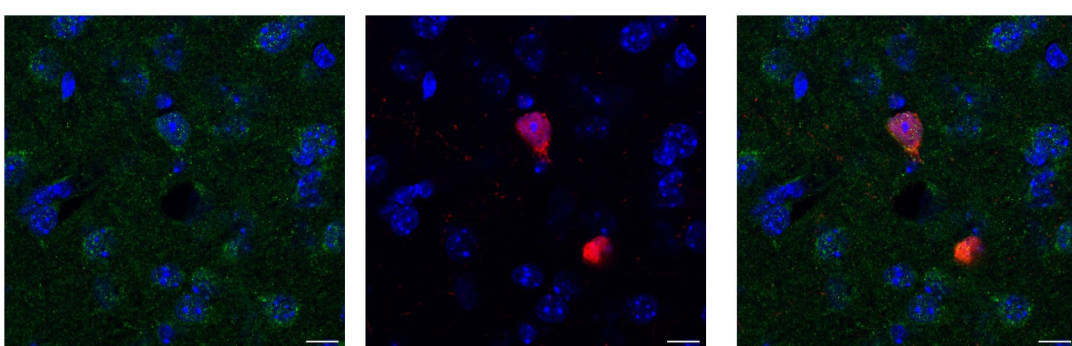

L6



SSTR5/VIP/DAPI

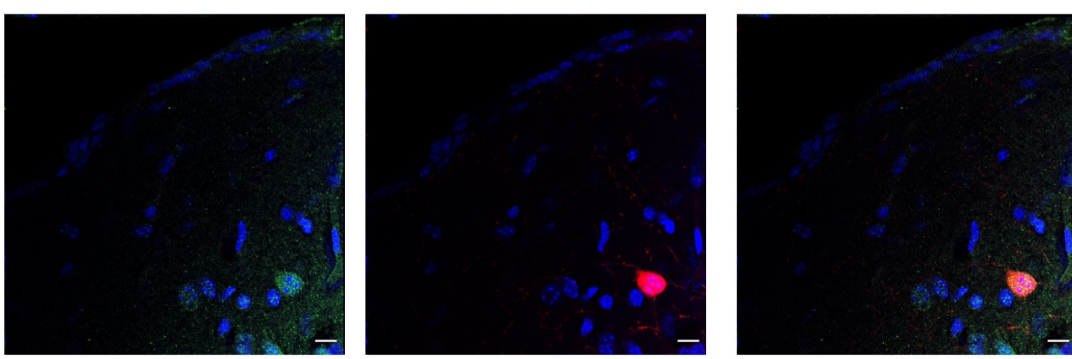

L1

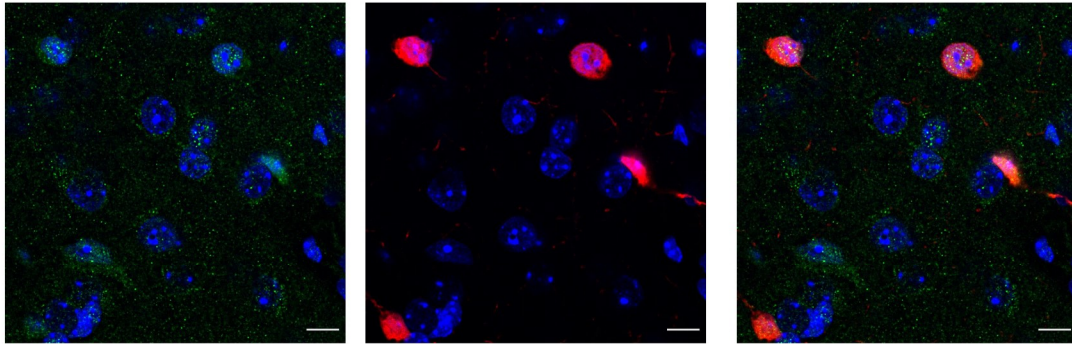

L2

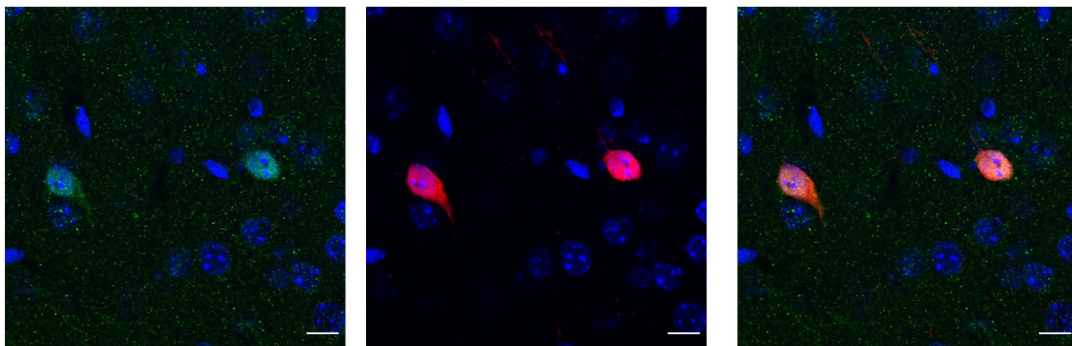

L3

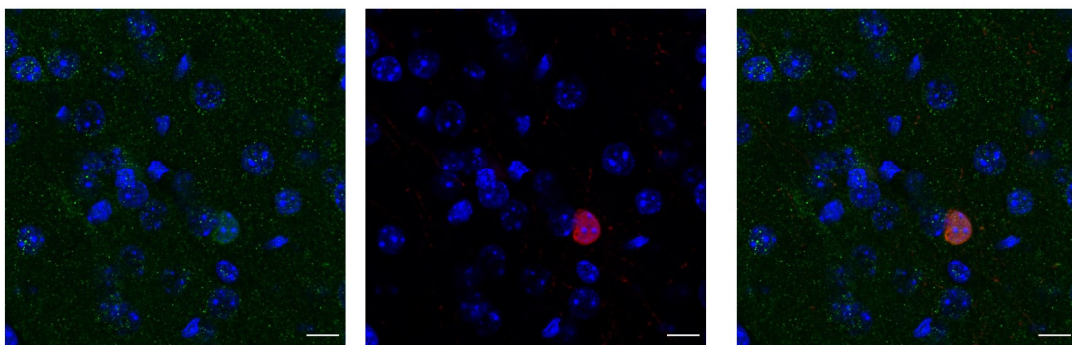

L4

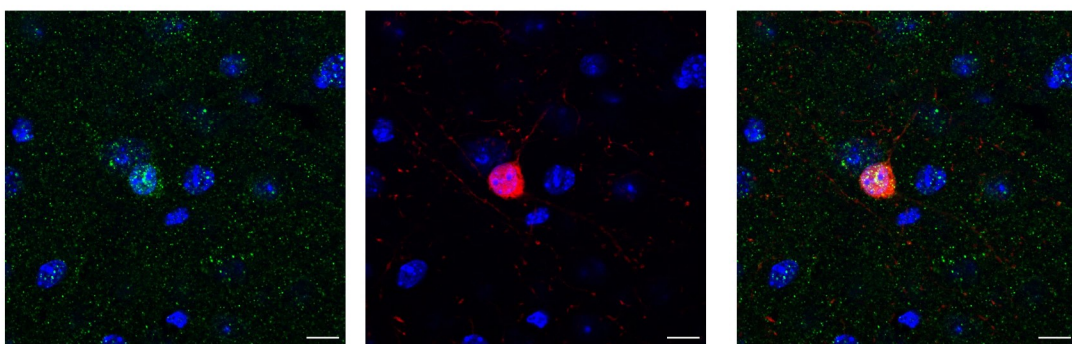

L5

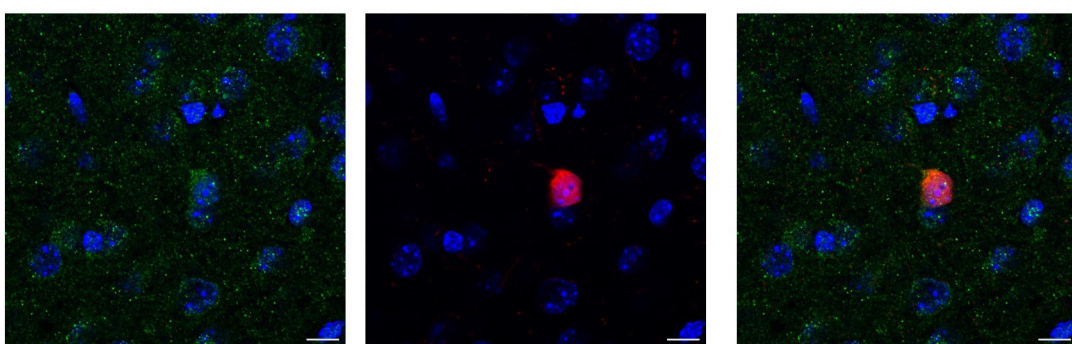

L6



Table S1. Table presents results of quantitative analysis of the density of particular INs and percentage of SSTR immunopositive INs in different cortical layers of mouse somatosensory cortex. Mean  $\pm$  SD.

|              | PV INs/mm <sup>2</sup> | SSTR positive PV INs/mm <sup>2</sup> | Percentage of SSTR positive PV INs | SST INs/mm <sup>2</sup> | SSTR positive SST INs/mm <sup>2</sup> | Percentage of SSTR positive SST INs | VIP INs/mm <sup>2</sup> | SSTR positive VIP INs/mm <sup>2</sup> | Percentage of SSTR positive VIP INs |
|--------------|------------------------|--------------------------------------|------------------------------------|-------------------------|---------------------------------------|-------------------------------------|-------------------------|---------------------------------------|-------------------------------------|
| <b>L2/3</b>  |                        |                                      |                                    |                         |                                       |                                     |                         |                                       |                                     |
| <b>SSTR1</b> | 316.9 $\pm$ 24.4       | 243.9 $\pm$ 13.8                     | 77.4 $\pm$ 8.7                     | 80.9 $\pm$ 9.2          | 52.4 $\pm$ 6.2                        | 65.9 $\pm$ 13.5                     | 98.9 $\pm$ 31.8         | 28.4 $\pm$ 12.5                       | 28.6 $\pm$ 7.3                      |
| <b>SSTR2</b> | -                      | -                                    | -                                  | 76.0 $\pm$ 10.5         | 28.1 $\pm$ 10.1                       | 36.4 $\pm$ 8.8                      | 106.1 $\pm$ 31.3        | 62.9 $\pm$ 29.0                       | 57.0 $\pm$ 10.3                     |
| <b>SSTR3</b> | 209.1 $\pm$ 60.0       | 158.7 $\pm$ 63.2                     | 74.3 $\pm$ 10.3                    | 103.1 $\pm$ 21.6        | 85.0 $\pm$ 24.6                       | 81.4 $\pm$ 7.0                      | 125.0 $\pm$ 26.2        | 108.7 $\pm$ 23.5                      | 87.0 $\pm$ 3.9                      |
| <b>SSTR4</b> | 151.1 $\pm$ 55.7       | 64.3 $\pm$ 37.6                      | 40.2 $\pm$ 11.8                    | 85.3 $\pm$ 15.4         | 57.2 $\pm$ 16.8                       | 66.1 $\pm$ 10.1                     | 103.7 $\pm$ 27.9        | 57.9 $\pm$ 18.0                       | 55.6 $\pm$ 5.1                      |
| <b>SSTR5</b> | 146.6 $\pm$ 20.8       | 109.0 $\pm$ 19.8                     | 74.1 $\pm$ 5.2                     | 87.8 $\pm$ 20.6         | 78.8 $\pm$ 19.8                       | 89.9 $\pm$ 7.8                      | 113.2 $\pm$ 16.9        | 91.9 $\pm$ 21.2                       | 80.5 $\pm$ 8.6                      |
| <b>L4</b>    |                        |                                      |                                    |                         |                                       |                                     |                         |                                       |                                     |
| <b>SSTR1</b> | 215.0 $\pm$ 31.0       | 165.6 $\pm$ 31.5                     | 76.9 $\pm$ 7.2                     | 124.4 $\pm$ 27.3        | 91.8 $\pm$ 19.8                       | 74.3 $\pm$ 10.8                     | 93.6 $\pm$ 47.5         | 44.7 $\pm$ 21.0                       | 48.9 $\pm$ 6.8                      |
| <b>SSTR2</b> | -                      | -                                    | -                                  | 156.4 $\pm$ 59.0        | 54.4 $\pm$ 22.9                       | 35.2 $\pm$ 5.7                      | 88.0 $\pm$ 14.9         | 37.9 $\pm$ 15.7                       | 42.8 $\pm$ 15.0                     |
| <b>SSTR3</b> | 290.6 $\pm$ 50.7       | 260.9 $\pm$ 45.1                     | 89.9 $\pm$ 5.7                     | 234.0 $\pm$ 29.3        | 212.5 $\pm$ 24.3                      | 91.0 $\pm$ 5.2                      | 77.3 $\pm$ 10.2         | 66.9 $\pm$ 14.3                       | 85.8 $\pm$ 9.9                      |
| <b>SSTR4</b> | 335.1 $\pm$ 23.9       | 205.8 $\pm$ 32.0                     | 62.1 $\pm$ 13.7                    | 181.4 $\pm$ 28.1        | 110.5 $\pm$ 22.4                      | 60.9 $\pm$ 7.6                      | 69.9 $\pm$ 9.9          | 40.8 $\pm$ 6.9                        | 59.0 $\pm$ 11.2                     |
| <b>SSTR5</b> | 312.8 $\pm$ 36.4       | 235.5 $\pm$ 31.5                     | 75.3 $\pm$ 7.0                     | 205.3 $\pm$ 71.3        | 168.0 $\pm$ 53.8                      | 83.0 $\pm$ 5.1                      | 63.1 $\pm$ 11.4         | 56.7 $\pm$ 9.4                        | 90.5 $\pm$ 9.2                      |
| <b>L5/6</b>  |                        |                                      |                                    |                         |                                       |                                     |                         |                                       |                                     |
| <b>SSTR1</b> | 220.5 $\pm$ 40.5       | 189.8 $\pm$ 48.9                     | 77.4 $\pm$ 8.7                     | 250.1 $\pm$ 42.4        | 234.0 $\pm$ 42.8                      | 93.4 $\pm$ 3.5                      | 25.6 $\pm$ 10.4         | 13.8 $\pm$ 5.5                        | 54.1 $\pm$ 3.8                      |
| <b>SSTR2</b> | -                      | -                                    | -                                  | 215.3 $\pm$ 46.5        | 36.7 $\pm$ 19.1                       | 16.8 $\pm$ 6.7                      | 38.2 $\pm$ 9.9          | 18.4 $\pm$ 6.4                        | 47.1 $\pm$ 6.1                      |
| <b>SSTR3</b> | 214.2 $\pm$ 63.0       | 206.0 $\pm$ 61.4                     | 96.2 $\pm$ 2.4                     | 231.0 $\pm$ 14.0        | 224.6 $\pm$ 12.7                      | 97.3 $\pm$ 1.9                      | 34.3 $\pm$ 5.5          | 29.6 $\pm$ 5.8                        | 85.9 $\pm$ 5.1                      |
| <b>SSTR4</b> | 132.6 $\pm$ 30.2       | 48.8 $\pm$ 17.6                      | 35.8 $\pm$ 6.6                     | 171.9 $\pm$ 28.1        | 83.1 $\pm$ 22.5                       | 48.9 $\pm$ 11.9                     | 28.9 $\pm$ 11.0         | 9.0 $\pm$ 4.9                         | 30.1 $\pm$ 7.8                      |
| <b>SSTR5</b> | 175.5 $\pm$ 74.4       | 162.8 $\pm$ 65.0                     | 93.0 $\pm$ 7.0                     | 221.5 $\pm$ 32.9        | 201.7 $\pm$ 43.6                      | 90.4 $\pm$ 7.6                      | 28.1 $\pm$ 5.6          | 24.1 $\pm$ 6.3                        | 85.4 $\pm$ 13.4                     |
